# Supplementary material for: Restoration of KMT2C/MLL3 in human colorectal cancer cells reinforces genome-wide H3K4me1 profiles and influences cell growth and gene expression
Source: PubMed Central journal article supplement (PMC7257146; doi:10.1186/s13148-020-00863-z), 2020-05-29
Supplement: 13148_2020_863_MOESM2_ESM.pdf [file 13148_2020_863_MOESM2_ESM.pdf]

## ADDITIONAL FILE 2

### SUPPLEMENTARY TABLES 1, 2, 3, 8, 9, 10

Restoration of KMT2C/MLL3 in human colorectal cancer cells reinforces genome wide H3K4me1 profiles and influences cell growth and gene expression

Chatarina Larsson, Lina Cordeddu, Lee Siggens, Tatjana Pandzic, Snehangshu Kundu, Liqun He, Muhammad Akhtar Ali, Nuša Pristovšek, Karin Hartman, Karl Ekwall, Tobias Sjöblom

**Table S1.** Summary of genes differentially regulated in RKO and HCT116 following restoration of *KMT2C* expression.

**Table S2.** Differentially regulated genes in RKO and HCT116 *KMT2C*<sup>insG</sup> clones observed to overlap or expected to overlap by chance if regulation is random.

**Table S3.** Upregulated genes in RKO and HCT116 *KMT2C*<sup>insG</sup> clones observed to overlap or expected to overlap by chance if regulation is random.

**Table S8.** PCR primer sequences.

**Table S9.** The shRNA lentiviruses and TaqMan probes used for stable knockdown cell line generation.

**Table S10.** Primers for RT-qPCR with SYBR Green detection.

**Table S1.** Summary of genes differentially regulated in RKO and HCT116 following restoration of *KMT2C* expression.

| Cell line | Clone | Number of regulated genes (>1.5 log <sub>2</sub> fold) | Upregulated (%) | Total number of regulated genes per cell line |
|-----------|-------|--------------------------------------------------------|-----------------|-----------------------------------------------|
| HCT116    | KI1   | 73                                                     | 40              | 353                                           |
|           | KI2   | 137                                                    | 52              |                                               |
|           | KI3   | 209                                                    | 50              |                                               |
| RKO       | KI1   | 265                                                    | 57              | 853                                           |
|           | KI2   | 678                                                    | 65              |                                               |

**Table S2.** Differentially regulated genes in RKO and HCT116 *KMT2C<sup>insG</sup>* clones observed to overlap or expected to overlap by chance if regulation is random.

| Cell line |     | Total DEGs vs parental | Overlapping total DEGs |       |     |       |     |       |
|-----------|-----|------------------------|------------------------|-------|-----|-------|-----|-------|
|           |     |                        | KI1                    |       | KI2 |       | KI3 |       |
|           |     |                        | Obs                    | (Exp) | Obs | (Exp) | Obs | (Exp) |
| RKO       | KI1 | 265                    | -                      | -     | 90  | (≤16) | /   |       |
|           | KI2 | 678                    | 90                     | (≤16) | -   | -     |     |       |
| HCT 116   | KI1 | 73                     | -                      | -     | 16  | (≤3)  | 19  | (≤4)  |
|           | KI2 | 137                    | 16                     | (≤3)  | -   | -     | 36  | (≤5)  |
|           | KI3 | 209                    | 19                     | (≤4)  | 36  | (≤5)  | -   | -     |

DEG – differentially expressed gene; Obs – observed; Exp – expected statistically (upper limit for 99% confidence interval, Bonferroni-correction for multiple hypothesis testing).

**Table S3.** Upregulated genes in RKO and HCT116 *KMT2C<sup>insG</sup>* clones observed to overlap or expected to overlap by chance if regulation is random.

| Cell line |     | DEGs upreg vs parental | Overlapping upregulated DEGs |       |     |       |     |       |
|-----------|-----|------------------------|------------------------------|-------|-----|-------|-----|-------|
|           |     |                        | KI1                          |       | KI2 |       | KI3 |       |
|           |     |                        | Obs                          | (Exp) | Obs | (Exp) | Obs | (Exp) |
| RKO       | KI1 | 152                    | -                            | -     | 44  | (≤9)  | /   |       |
|           | KI2 | 444                    | 44                           | (≤9)  | -   | -     |     |       |
| HCT 116   | KI1 | 29                     | -                            | -     | 4   | (≤2)  | 7   | (≤2)  |
|           | KI2 | 71                     | 4                            | (≤2)  | -   | -     | 25  | (≤3)  |
|           | KI3 | 105                    | 7                            | (≤2)  | 25  | (≤3)  | -   | -     |

DEG – differentially expressed gene; Obs – observed; Exp – expected statistically (upper limit for 99% confidence interval, Bonferroni-correction for multiple hypothesis testing).

**Table S8.** PCR primer sequences.

| Number | Name      | Step                                    | Sequence                                                                      |
|--------|-----------|-----------------------------------------|-------------------------------------------------------------------------------|
| 1      | HA1attB1  | HA1 amplification for cloning           | <b>GGGGACAAC</b> TTTGTATAATAAAGTTGGTGATAGCTTTGCTTTTGT                         |
| 2      | HA1attB4  | HA1 amplification for cloning           | <b>GGGGACAAC</b> TTTGTATAGAAAAGTTGGGTGATTGCTGAGGAGGCACAAGTTCGGGGATGATGTTTGAAT |
| 3      | HA2attB3  | HA2 amplification for cloning           | <b>GGGGACAAC</b> TTTGTATAATAAAGTTGGTGATAGCTTTGCTTTTGT                         |
| 4      | HA2attB2  | HA2 amplification for cloning           | <b>GGGGACCACT</b> TTGTACAAGAAAGCTGGGTACTTCCGTTTTTACCTCATTGG                   |
| 5      | M13F      | Entry clone screening                   | GTAAAACGACGGCCAGT                                                             |
| 6      | M13R      | Entry clone screening                   | GTCATAGCTGTTTCCTG                                                             |
| 7      | HA2 mutF  | Site-directed mutagenesis               | CAGTGTGTATCTGTTGAACCAAAGAAAAAGGAACAAGAAAACAAAC                                |
| 8      | HA2 mutR  | Site-directed mutagenesis               | GTTTTGTTTTCTTGTCCTTTTTCTTTGGTTCAACAGATACACACTG                                |
| 9      | LR HA1F   | LR screening HA1                        | TCCACCACTAGGGGTTCTG                                                           |
| 10     | LRHA1R    | LR screening HA1                        | CCTGTGGAGAGAAAGGCAAA                                                          |
| 11     | LR HA2F   | LR screening HA2                        | GGGTTCTGCGGCCCAATCCG                                                          |
| 12     | LR HA2R   | LR screening HA2                        | TCGCCTTCTTGACGAGTTCT                                                          |
| 13     | KI ScrF   | Cell clone construct integration screen | CAGGAGGCTGAGACAAAAGG                                                          |
| 14     | KI ScrR   | Cell clone construct integration screen | ATTTGCTGAGGAGGCACAAG                                                          |
| 15     | HA1 scr F | Cell clone HA1 integration              | CAGGAGGCTGAGACAAAAGG                                                          |
| 16     | HA1 scr R | Cell clone HA1 integration              | TCGCCTTCTTGACGAGTTCT                                                          |
| 17     | HA2 scr F | Cell clone HA2 integration              | TCGCCTTCTTGACGAGTTCT                                                          |
| 18     | HA2 scr R | Cell clone HA2 integration              | CAGAAGCCTGTGAGCAAGGA                                                          |
| 19     | Ad cre F  | Selection cassette removal screen       | GAGGCCTGTAAGTCCCTCAA                                                          |
| 20     | Ad cre R  | Selection cassette removal screen       | CCTCCTGGAAATCCAAATCTT                                                         |

**Bold** - Att tag, *Italics* - Screening primer seq tag

**Table S9.** The shRNA lentiviruses and TaqMan probes used for stable knockdown cell line generation.

| <b>Gene</b>   | <b>SMARTvector–shRNA lentivirus</b>                                  | <b>TaqMan probe</b> |
|---------------|----------------------------------------------------------------------|---------------------|
| TSPAN1        | TSPAN1-VHS00-6200548<br>TSPAN1-VHS00-7719637<br>TSPAN1-VHS00-9695842 | Hs00371661_m1       |
| PRSS23        | PRSS23-VHS00-4789171<br>PRSS23-VHS00-8053333<br>PRSS23-VHS00-8515531 | Hs00359912_m1       |
| Non-silencing | RHS4348 (GIPZ-Lentivirus)                                            |                     |
| Actin         |                                                                      | Hs01060665_g1       |

**Table S10.** Primers for RT-qPCR with SYBR Green detection.

| Gene    | Primer sequences        |                          |
|---------|-------------------------|--------------------------|
|         | Forward                 | Reverse                  |
| ANK1    | AAAACGGCTCCGTGTGGAAGGA  | GATGATTCGGCACACCCTCTC    |
| HBE1    | AACCTCAAGCCCGCCTTTGCTA  | GGTGAACCTCTTGCCAAAGTGAG  |
| HKDC1   | ATCGCCGACTTCCTGGACTACA  | GCCTTGAAACCTTTGGTCCACC   |
| KCNN4   | CATTCCTGACCATCGGCTATGG  | GCCTTGTTAAACTCCAGCTTCCG  |
| KMT2C   | ATGTGTATCTGGCACGGTCTC   | CAATGTCTCGAGCAGCATACA    |
| PLK2    | CAACAATGGTGCTCACATGAGCC | GGAGCATCTGTTGCTGGGAAAAC  |
| PRSS23  | GTGAGGATGTGGAAGAGACAGC  | GAGAGGAGTGATTCTGACAGCC   |
| RPS4Y1  | GCCGTTTTGCTGTTACCCGCAT  | ATCTGGGTAGCGGATGGTTCGA   |
| SAMD9   | GGGAACCTACCTTGGCTATGCAC | CGTATTCCTGACGGTTCATTGCC  |
| SUSD2   | TGCACTTCGGATCATCGACAGC  | TCCTCTCGGAAGTCATCGCTCA   |
| SYK     | CGTATGAGCCAGAACTTGCACC  | CTTTCGGTCCAGGTAAACCTCC   |
| TESC    | CTGAGTGGAGATCAGCCTACCA  | CTGTTGTCTGAAGAAGGCACGAAC |
| TM4SF18 | GGATACTGCCTGGTCATCTCTG  | TGCAGGTTCCAGGCACTGAATC   |
| TNFSF4  | CCTACATCTGCCTGCACTTCTC  | TGATGACTGAGTTGTTCTGCACC  |
| TSPAN1  | TGCTGTGGTCGCCTTGGTGTAC  | TGGTGAAGCCACAGCACTTGAG   |
| TSPAN7  | CTCATCGGAACTGGCACCACTA  | CCTGAAATGCCAGCTACGAGCT   |
| WFIKKN1 | GTGTGCCCAACCAGCTCAGC    | CACACGTTGATGCAGCACTTCTC  |
