# Supplementary material for: Restoration of KMT2C/MLL3 in human colorectal cancer cells reinforces genome-wide H3K4me1 profiles and influences cell growth and gene expression
Source: PubMed Central journal article supplement (PMC7257146; doi:10.1186/s13148-020-00863-z), 2020-05-29
Supplement: 13148_2020_863_MOESM4_ESM.pdf [file 13148_2020_863_MOESM4_ESM.pdf]

ADDITIONAL FILE 4

Uncropped gels for Figure S1

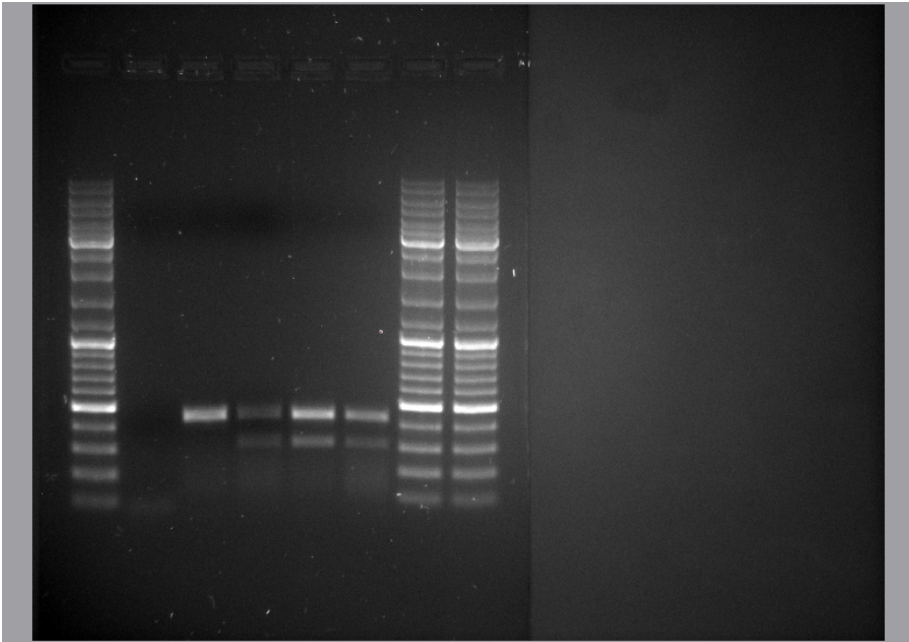

Loading: Ladder, Neg C (H<sub>2</sub>O), RKO parental, RKO KI1, RKO KI2, RKO KI2 (independent DNA prep), ladder

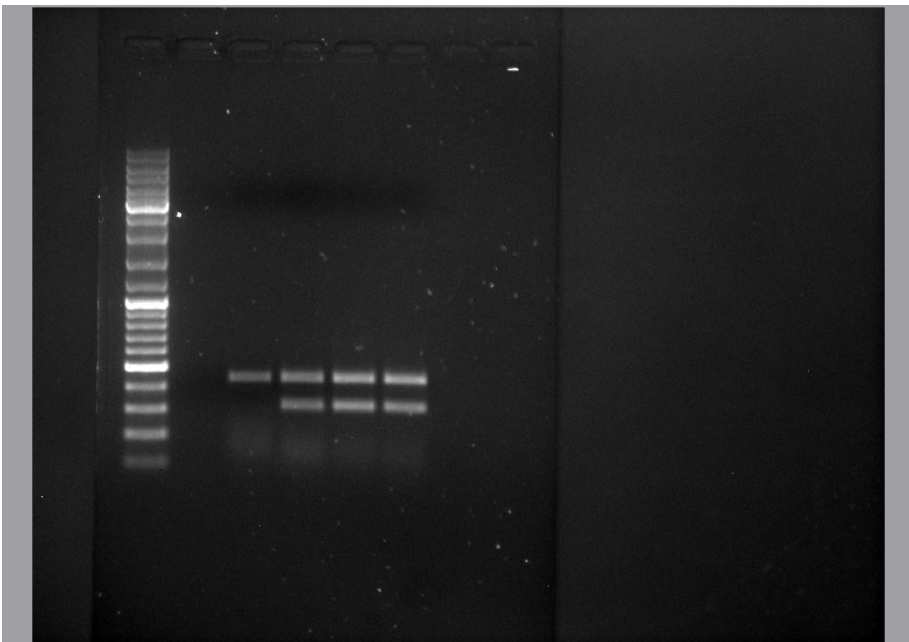

Loading: Ladder, Neg C (H<sub>2</sub>O), HCT116 parental, HCT116 KI1, HCT116 KI2, HCT116 KI3
