# Supplementary material for: Restoration of KMT2C/MLL3 in human colorectal cancer cells reinforces genome-wide H3K4me1 profiles and influences cell growth and gene expression
Source: Clin Epigenetics. 2020 May 29;12:74. doi: 10.1186/s13148-020-00863-z (PMC7257146; doi:10.1186/s13148-020-00863-z)
Supplement: Supplementary file 3 — Additional file 3: Table S4. Genes differentially expressed more than 1.5 log2 fold in RKO cells following restoration of KMT2C expression. Table S5. Genes differentially expressed more than 1.5 log2 fold in HCT116 cells following restoration of KMT2C expression. Table S6. Overlap analysis with the MSigDB Hallmarks gene set for genes differentially regulated >1.5 log2 fold by restoration of KMT2C expression in RKO and HCT116 cells. Table S7. Overlap analysis with the MSigDB Hallmarks gene set for genes upregulated >1.5 log2 fold by restoration of KMT2C expression in RKO and HCT116 cells. [file 13148_2020_863_MOESM3_ESM.xlsx]

## Sheet: Contents
ADDITIONAL FILE 3
SUPPLEMENTARY TABLES 4-7
Restoration of KMT2C/MLL3 in human colorectal cancer cells reinforces genome wide H3K4me1 profiles and influences cell growth and gene expression
Chatarina Larsson, Lina Cordeddu, Lee Siggens, Tatjana Pandzic, Snehangshu Kundu, Liqun He, Muhammad Akhtar Ali, Nuša Pristovšek, Karin Hartman, Karl Ekwall, Tobias Sjöblom
Table S4. Genes differentially expressed more than 1.5 log2 fold in RKO cells following restoration of KMT2C expression.
Table S5. Genes differentially expressed more than 1.5 log2 fold in HCT116 cells following restoration of KMT2C expression.
Table S6. Overlap analysis with the MSigDB Hallmarks gene set for genes differentially regulated >1.5 log2 fold by restoration of KMT2C expression in RKO and HCT116 cells.
Table S7. Overlap analysis with the MSigDB Hallmarks gene set for genes upregulated >1.5 log2 fold by restoration of KMT2C expression in RKO and HCT116 cells.

## Sheet: Table S4
Table S4. Genes differentially expressed more than 1.5 log2 fold in RKO cells following restoration of KMT2C expression.
Gene2	RKO FPKM	KMT2CinsG		KI1 log2 fold change in expression	KI2 log2 fold change in expression
		KI1 FPKM1	KI2 FPKM1
ADAMTS16	0.0689607	0.943563		3.77427
ANK1	0.0139777		1.70382		6.9295
EBI3	0.168217		2.45492		3.86729
FAM198B	1.16426	6.25078		2.42462
FGF9	0.588232	2.71447		2.20621
GEM	2.91495	0.9419		-1.62983
HIST1H2BG	2019.83		555.543		-1.86226
HKDC1	0.104292	2.21138	1.16182	4.40625	3.47769
IRS1	25.8148		3.15005		-3.03475
LTBP2	0.141787		1.13491		3.00078
MAML2	0.255682	1.15366	0.996572	2.17379	1.96262
MB21D2	4.23013	15.321		1.85673
NOTUM	14.6566		4.40906		-1.73301
NRP1	0.330394		9.81886		4.89329
PRSS23	5.02552	24.8275	23.9518	2.30459	2.25279
RGS16	4.34394		1.16009		-1.90477
SAMD9	0.430403		3.65044		3.08431
SATB1	4.36893		0.867596		-2.33218
SEMA3A	4.28002	1.37522		-1.63795
SLC23A3	0.20431		0.950752		2.21831
SLC2A3	69.4875		11.4042		-2.60719
SYK	8.79147	0		#DIV/0!
TERT	1.59272		0.32858		-2.27718
TSPAN1	0.15832		7.66066		5.59656
UBA7	0.101164		1.57007		3.95606
UNC13D	0.129707		2.62816		4.34073
VEPH1	0.255068		1.8771		2.87955
WFIKKN1	1.87851	0.622332		-1.59383
ZNF711	2.0108		0.25227		-2.99473
ABCC6	0.982641		0		#DIV/0!
ABCG2	0.774509	0.134619		-2.52441
ABHD16B	3.41898		11.1561		1.70619
ABTB1	2.13709		8.86612		2.05266
ACOX2	0.44958		2.45649		2.44995
ACPP	0	0.994831		#DIV/0!
ACTA2	0.71922		4.90151		2.76872
ACTN3	0.828838		0.0587564		-3.81827
ADAMTS9	1.22853		0.317031		-1.95424
ADAMTSL1	34.5308		5.99053		-2.52713
ADAMTSL5	1.1491		5.29769		2.20486
ADAT2	2.9846		0.858681		-1.79734
ADIRF	20.3933		101.24		2.31161
ADPRHL1	1.32262		8.92161		2.75391
ADSSL1	0.343051		1.74506		2.34678
AGAP2	0.301031		2.27575		2.91836
AHNAK	44.4888		171.797		1.94919
AHNAK2	0.324179		11.1276		5.1012
AKAP12	4.63225		37.973		3.03519
AKR1C1	0		5.21092		#DIV/0!
ALCAM	6.34984		28.944		2.18847
ALDH3B1	0.625307	2.55404		2.03015
AMN1	1.86519		0.328059		-2.50729
AMOTL1	0.0555315		40.355		9.50523
ANGPTL4	5.85263		31.0596		2.40788
ANKRD1	5.35869	471.466	0.469757	6.45913	-3.5119
ANKRD20A12P	0.278488		1.78667		2.68159
ANKRD20A5P	0.288509	1.19599		2.05151
ANKRD32	3.94437		0.969859		-2.02395
ANKRD50	6.46076	2.11368		-1.61194
ANTXR2	22.994	5.48845		-2.06679
ANXA2P2	0.751631		2.40699		1.67913
AOX1	0.0145051		0.803042		5.79085
AP1M2	7.75473		2.63936		-1.55489
AP5Z1	5.05287		15.5318		1.62005
APOL6	0.150762		1.15458		2.93702
AQP3	3.876		0		#DIV/0!
ARAP2	2.70939		0.821554		-1.72154
ARG2	23.4899		5.67911		-2.0483
ARHGAP19	12.3506		2.27218		-2.44243
ARHGAP23	0.818938	3.23022		1.97981
ARHGAP29	30.1763	8.58091		-1.81422
ARHGEF37	0.988728		4.17916		2.07957
ARL4C	1.27555	15.5048	0	3.60352	#DIV/0!
ASAP2	4.29324		13.2009		1.6205
ASNS	88.9994		28.2644		-1.65481
ATG16L2	16.7984		54.7345		1.70413
ATL1	0.260197	0.783402	0.94499	1.59015	1.8607
ATOH8	0.258155	0.886829		1.78042
ATP2B4	2.42257		37.3105		3.94497
ATP8A1	0.896654		0.280971		-1.67413
AXIN2	9.40084		0.818461		-3.5218
BACE1	0.980837		3.03877		1.6314
BACH1	12.7353	41.1364		1.69158
BATF2	0.0790968		1.78657		4.49743
BCAR3	7.18614	26.8622	26.6032	1.90229	1.88831
BCL10	7.0079		29.6033		2.0787
BCL2A1	0.742951	0	3.84671	#DIV/0!	2.37229
BDNF	1.59788	19.0438	0.0352705	3.57509	-5.50155
BHLHE40	8.02225		28.2987		1.81866
BMP2K	4.66451	19.7352		2.08098
BMP4	1.12924	0	4.97031	#DIV/0!	2.13798
BNC2	0.188829		1.20403		2.67271
BPGM	11.3518		3.82084		-1.57096
BTBD11	1.85025		0.548064		-1.75531
BTNL8	0		1.10136		#DIV/0!
BTNL9	0.452258		5.99713		3.72905
BZW1	74.2718		412.003		2.47177
C10orf25	0.24817		1.8711		2.91448
C12orf60	1.55107		0.360641		-2.10463
C19orf33	60.0428		265.614		2.14527
C19orf71	2.27154		6.57442		1.53319
C1orf110	0.212159		4.26156		4.32816
C1R	0.850841		3.80181		2.15972
C21orf67	1.73903		7.8226		2.16936
C2CD3	2.94649	8.8436		1.58564
C2orf15	1.8607		0.553671		-1.74874
C2orf82	1.424		9.02827		2.6645
C4BPB	0	0.899127		#DIV/0!
C4orf32	1.00225	0.266534		-1.91085
C6orf99	0.522261		2.87148		2.45895
C9orf169	1.99224		69.1026		5.11628
CA12	8.14463		2.12833		-1.93613
CA9	0.924026		0		#DIV/0!
CADM1	10.2491		2.42909		-2.07701
CALB2	1.10385		69.4091		5.97451
CALD1	17.711	62.5566		1.82052
CAMK1D	15.6643		5.43803		-1.52632
CAMK2N1	1.26176		10.4459		3.04943
CAPN3	0.356593		1.246		1.80495
CARD10	14.0887		42.1906		1.58238
CARD6	0.270403		0.8566		1.66351
CASC8	8.49493		2.05769		-2.04557
CASP10	1.09261	0.201212	5.56887	-2.44099	2.34961
CAV1	24.2723	76.6847	113.416	1.65963	2.22424
CCAT1	7.1892	2.45473	0.128868	-1.55027	-5.80187
CCDC102A	1.1336		3.7669		1.73247
CCDC103	1.43025		5.49118		1.94085
CCDC120	0.772731		0.0715763		-3.43241
CCDC151	0.536605		2.08531		1.95833
CCDC167	59.6955		19.5397		-1.61121
CCDC28B	41.048		13.5921		-1.59454
CCDC62	0.259736		0.854257		1.71762
CCDC64B	0.380869		1.71016		2.16676
CCDC71L	2.89242	9.53686		1.72124
CCDC78	1.18423		4.11104		1.79555
CCDC80	2.21287	10.7365	15.5828	2.27853	2.81596
CCNJL	0.335763	1.2803		1.93096
CCRL2	0.645098		3.03312		2.23321
CCT6P3	0.700219	2.10326		1.58675
CD274	0.921276		8.0776		3.13222
CD27-AS1	0.695312		1.98852		1.51596
CD44	2.47188	0	26.6646	#DIV/0!	3.43124
CD68	92.5779	12.3175		-2.90996
CD9	106.573		708.625		2.73317
CDC42BPG	2.43509		0.185101		-3.71758
CDC42EP3	2.64651		16.3123		2.62379
CDCP1	21.9565		96.1824		2.13112
CDH15	0.616692		3.15585		2.3554
CDKL1	3.84165		1.23028		-1.64274
CDKN1A	59.334		245.505		2.04882
CDKN2A	1.60454	0	10.7264	#DIV/0!	2.74093
CDKN2B	3.99453	42.0326		3.39541
CDYL2	1.19638		4.25012		1.82882
CEL	0.335575		1.39596		2.05655
CELF5	0.151411		0.840066		2.47204
CELSR3	0.286822		1.38739		2.27415
CHKB-AS1	1.67087		6.19517		1.89055
CHRNA5	2.56726		0.8542		-1.58759
CITED2	7.31452	36.4216	28.6135	2.31596	1.96786
CLDN4	0.184811		0.819447		2.1486
CLEC11A	35.4903	8.62942		-2.04009
CLIC3	0.703793	4.23124		2.58786
CNN1	0.364229	6.1681		4.08191
COL1A1	0.231625	0.777472		1.747
COL4A2	0.332012	1.93841		2.54557
COL6A1	33.8219		7.34465		-2.20319
COPZ2	3.10957		9.94599		1.6774
COQ3	16.695		5.01908		-1.73392
CORO1C	60.2336	21.1557		-1.50952
CORO2B	0.48174		1.54586		1.68208
COX17	172.639		55.7189		-1.63152
COX6B2	0.470849	1.77066		1.91095
CPA4	0.207817	1.36546	1.6256	2.71601	2.96759
CPS1	0.488394		3.43656		2.81485
CPVL	4.19438	0	12.9424	#DIV/0!	1.62558
CRABP2	190.966		15.5264		-3.62052
CREB5	0.872259		0.240164		-1.86073
CRISPLD2	0.0758698		1.97		4.69853
CRMP1	0.723552	0	3.45263	#DIV/0!	2.25453
CSF3	0		43.815		#DIV/0!
CSPG4	0.0478679		0.743085		3.9564
CTGF	11.6503		1.0912		-3.41637
CTH	7.64208		2.34626		-1.7036
CTNNBIP1	7.30202		36.7733		2.33229
CTSL	125.299		402.861		1.68491
CXCL3	0.184561		2.9807		4.01348
CXorf57	4.49189	1.25883	0.673918	-1.83525	-2.73668
CYP24A1	4.03815		0		#DIV/0!
CYP26B1	2.44556		8.0294		1.71512
CYTH3	12.8588	38.9035		1.59714
DCDC2	0.0443803		2.81947		5.98936
DCLK1	31.4418		0		#DIV/0!
DDR2	0.23454		0.717408		1.61296
DGKI	1.28702	0	0.0819882	#DIV/0!	-3.97248
DHDH	4.90921		1.37687		-1.83409
DHRS2	0.317579		3.17135		3.31991
DHRS3	6.7205		0.219654		-4.93526
DISP2	0.503637		3.97425		2.98023
DKK3	0.202267	0.762272		1.91405
DNAJA4	6.12158		1.67627		-1.86865
DNAJC12	12.9952	0.494915		-4.71465
DNMT3B	7.40591		2.12101		-1.80393
DNTTIP1	22.323		91.1576		2.02983
DPYD	0.293661	0.912087		1.63502
DTX4	2.58517		0.134153		-4.2683
DUSP6	19.832	74.2056	57.8821	1.9037	1.54529
DYSF	0.482145	1.67079		1.793
EAF2	4.39223		0.866351		-2.34193
ECM1	0.564448		32.7418		5.85815
EFNB2	1.25721	0.0989323	6.70873	-3.66764	2.41581
EGR3	0.405298		3.43773		3.0844
EHD1	23.45		131.75		2.49014
EHD2	1.27951		11.2545		3.13685
EHHADH	1.49608		0.183207		-3.02965
EIF5AL1	2.24829	0.45572		-2.30261
ELL2	4.1127		24.7445		2.58895
EMILIN3	0.432118		1.53069		1.82469
EMP1	35.0489		109.84		1.64796
EMP3	39.4103		120.078		1.60733
ENDOD1	1.82049		0		#DIV/0!
ENO1-AS1	1.05699	0.211562		-2.32081
EPG5	3.56604		10.5964		1.57118
EPHB6	0.139403	0.785486		2.49432
ERCC6	1.92848		12.5126		2.69785
ERCC6-PGBD3	1.83104		18.1381		3.30828
ERRFI1	8.64975		256.019		4.88745
ESCO2	5.36271	1.80375		-1.57196
ESPNL	0.0747627		4.87849		6.02797
ETNK2	2.53591		0.0863899		-4.8755
ETS1	7.7999	1.31443		-2.56902
EVA1A	2.40733		25.5301		3.4067
EVA1B	15.104		48.7089		1.68926
EVC	4.37843	0	16.2204	#DIV/0!	1.88932
EXPH5	3.24834		0.493068		-2.71984
F3	2.37273		0.63878		-1.89316
F8	0.370745		2.64097		2.83257
FAM102A	3.65077		12.3524		1.75852
FAM109B	1.7893		0.0978418		-4.1928
FAM131B	1.64237		0.040888		-5.32796
FAM167A	1.0235		9.62134		3.23273
FAM171B	6.90297		1.92815		-1.84
FAM209B	1.00748	0		#DIV/0!
FAM46B	2.57924	9.38676		1.86368
FAM90A1	0.417066		1.29911		1.63918
FBLN5	0.351327		2.36992		2.75396
FBXO21	10.4423		2.29568		-2.18545
FBXO36	2.06233		0.447219		-2.20522
FERMT3	23.2194		102.787		2.14625
FEZ2	106.861		36.6215		-1.54498
FGF18	0.189633	2.67435		3.81791
FHDC1	0.962187		0.285775		-1.75144
FHL2	58.4354		255.662		2.12932
FILIP1L	0.56116		4.12665		2.87849
FKBP14	5.15522		1.46556		-1.81459
FKBP5	12.1563		3.71132		-1.7117
FLG	0.0480251		1.26486		4.71905
FLG-AS1	0.0902977		0.758302		3.07001
FLJ20021	2.6783		8.67719		1.69591
FLJ32255	1.32979		6.18506		2.21758
FLNB	42.5333		240.537		2.49959
FLYWCH1	15.2303		47.6753		1.6463
FOSB	1.34423	0.373279		-1.84845
FOXD1	12.3399		66.6839		2.43401
FOXF1	1.86664		7.03848		1.91482
FOXL1	0.154068		17.6239		6.83782
FRMD5	6.81139		0.823309		-3.04844
FRMD6	10.9202		44.2403		2.01837
FZD2	3.61998	15.9393	18.1881	2.13854	2.32894
G0S2	33.4866	3.33		-3.32999
GADD45A	34.0344		146.57		2.10652
GADD45G	1.80061	5.15424		1.51728
GAREM	2.11183		0.568091		-1.8943
GBA	15.3892		56.4196		1.87428
GCA	2.14189		0.303513		-2.81906
GDPD1	4.84453		1.09878		-2.14046
GDPD3	1.06112		7.16651		2.75568
GEMIN8	11.1219		2.87822		-1.95015
GFPT2	1.01427	0		#DIV/0!
GGT1	10.6299	0.653688	33.1096	-4.02338	1.63912
GLRX	41.5266	13.6445		-1.60571
GLS2	11.6243		3.94727		-1.55822
GNAL	7.3671		1.33851		-2.46047
GPNMB	0.296207	5.37089		4.18048
GPR126	15.3805		2.81469		-2.45006
GPR39	0.157974		1.44856		3.19686
GPRC5A	4.43696	57.6293	144.074	3.69916	5.02109
GRAMD3	0		1.08283		#DIV/0!
GRB7	0.0668575		2.25508		5.07594
GREB1	0.0942081		0.911142		3.27375
GRIP1	0.955662		0		#DIV/0!
GRK5	2.86829		12.184		2.08672
GSK3B	4.08577		23.2748		2.51009
GSN	27.2713		111.512		2.03174
GSTA4	10.6737		2.81805		-1.92129
GSTM1	19.3837	0		#DIV/0!
GSTM3	13.3372		1.18004		-3.49854
GXYLT2	3.78272		0.466651		-3.01901
H2AFY2	27.3585		6.62515		-2.04597
HBE1	100.284	0	1.22334	#DIV/0!	-6.35712
HDAC9	2.21814	0.0704562		-4.97648
HECW1	0.242161	0.838437		1.79174
HERC4	3.43841		14.3886		2.06511
HES4	135.413		46.7087		-1.5356
HEXIM2	2.97725		8.72704		1.55151
HIAT1	14.2961		2.1579		-2.72792
HIST1H1T	2.14157		0.396627		-2.43281
HIST1H2AE	1655.35		522.725		-1.66301
HIST1H2AJ	679.045		169.247		-2.00438
HIST1H2BE	8.1382	1.99369	2.49706	-2.02927	-1.70448
HIST1H2BM	351.524		33.626		-3.38597
HIST1H4A	929.649		300.433		-1.62964
HIST1H4D	3373.14		578.632		-2.54338
HIST1H4I	1661.99		480.769		-1.78949
HKR1	12.2506	47.2141		1.94637
HLA-B	59.7744		173.84		1.54016
HMGN5	1.6992	0.564776		-1.58911
HMOX1	26.4397		159.162		2.58972
HMSD	4.27971	1.46612		-1.54551
HOGA1	0.0722655		1.05283		3.86483
HOXC13	2.60195		0.190677		-3.77039
HPCAL1	43.6803		163.747		1.90641
HR	0.606446		5.80357		3.25849
HRH1	3.74295		11.3641		1.60224
HRNR	0.0691547		0.788123		3.51052
HSF2BP	0.98692		3.9585		2.00395
HSPA1L	0.446608		1.34029		1.58547
HTRA1	0.139917		0.826121		2.56178
HYAL3	3.95109		13.1505		1.7348
HYDIN	0.124289		1.67592		3.75318
ICAM2	5.25063	0	21.724	#DIV/0!	2.04873
ID3	224.538		60.8337		-1.88402
IDUA	0.229492		0.934295		2.02544
IER5	12.9198		90.3143		2.80537
IFI44	0.189276		1.1781		2.6379
IFI6	5.92727		35.0973		2.56592
IFIT1	0.658427		3.7876		2.52419
IFIT2	0.350731	1.69729	2.35739	2.2748	2.74875
IFIT3	0.657131		5.5699		3.0834
IFITM1	55.6051		15.9611		-1.80065
IFT122	7.97754		2.38911		-1.73947
IGFBP6	56.6712		368.655		2.70159
IL13RA2	1.35014	0	0	#DIV/0!	#DIV/0!
IL17RB	9.32067		2.4268		-1.94138
IL20RA	1.2275		0.0392968		-4.96517
IL7	2.10678	0.415846		-2.34092
ILDR2	3.12162		0.0947293		-5.04234
INADL	5.53964		1.74412		-1.66729
INPP5D	0.0942646		2.84622		4.91619
IQCC	2.24684	0.519723		-2.11208
IRAK1	75.7783	26.126		-1.5363
IRF9	2.67619		13.6593		2.35163
ITGA3	13.1801		182.602		3.79227
ITGB2	0.0775829		4.7369		5.93206
ITGB2-AS1	0.0521135		2.36419		5.50355
ITPR3	65.1293		262.033		2.00837
IVNS1ABP	35.7894		9.35399		-1.93588
JAG1	57.9247		3.05187		-4.24642
JPH1	6.09898		1.50147		-2.02219
JUN	52.4802		155.274		1.56497
KANK3	1.40824		4.61627		1.71284
KAT2A	32.4789	8.92738		-1.8632
KCNN4	0.178489	3.68158	227.209	4.36642	10.314
KCTD12	0.842135		0		#DIV/0!
KDM5A	9.58086		2.64076		-1.8592
KIAA0040	2.30899		0.52687		-2.13174
KIAA0754	2.94067		8.38072		1.51093
KIAA1324	0.224175		3.37009		3.91009
KIAA1755	0.170451		0.725326		2.08927
KIF17	0.22918	1.1124	3.56806	2.27913	3.96058
KIF26B	1.06047		0.170718		-2.63502
KISS1	0		1.46598		#DIV/0!
KLF15	6.89859		2.3892		-1.52977
KLF2	1.58025		6.6924		2.08237
KLF4	1.85345		27.9773		3.91597
KLF5	2.75646	8.69508		1.65738
KLF6	4.69057		30.8575		2.71778
KNDC1	0.556173		2.02039		1.86103
KRCC1	0.7234		3.63144		2.32768
KRT17	0.0513713		1.1239		4.45141
KRT18	264.386		882.988		1.73975
KRT7	3.16234	26.0076	14.8554	3.03987	2.23192
KRT80	7.2008		1.90766		-1.91635
KRT81	0.84786	0.242351		-1.80673
LAMA1	20.7612	0.147803		-7.13407
LAMB2	20.637		62.8926		1.60765
LAMB3	25.3972	0.378029	212.158	-6.07003	3.0624
LAMC2	0.062122		7.57979		6.93091
LBX2-AS1	2.52694		7.54189		1.57753
LCN15	0.791571		2.8264		1.83617
LCP1	41.4272	0		#DIV/0!
LDHD	1.66655		9.74444		2.54772
LGALS1	369.401	1122.71	2589.42	1.60372	2.80937
LGALS3BP	11.3293	70.6282	213.399	2.64019	4.23543
LGI2	0.830759		0		#DIV/0!
LIF	25.7311	4.36887		-2.55818
LIMCH1	4.82169	14.5602		1.59442
LINC00035	0.764841		9.83277		3.68437
LINC00115	1.9821	0.695936		-1.51001
LINC00326	5.20514	0.204459	0	-4.67006	#DIV/0!
LINC00337	0.440329		1.39209		1.6606
LINC00346	1.68735	0.405934	6.03925	-2.05544	1.83961
LINC00664	0.624046	2.96726		2.24941
LINC00673	0.461299		9.17717		4.31428
LINC00702	0		1.26071		#DIV/0!
LINC00707	0		17.0904		#DIV/0!
LINC00853	0.557237		5.62883		3.33647
LINC00883	2.07978	7.47707	10.6193	1.84604	2.35219
LINC01089	1.13268		0.378896		-1.57986
LINC01106	0.456691		1.51799		1.73287
LINC01123	0.435463		1.89926		2.12482
LINC01204	0.193374		3.59722		4.21742
LINC01234	0.128404		4.7463		5.20804
LINC-PINT	7.14086	2.24757		-1.66773
LMCD1	1.39762		0		#DIV/0!
LMNA	122.629		633.624		2.36933
LOC100130705	0.27334		1.01933		1.89884
LOC100133445	0.817274		5.04121		2.62488
LOC100505715	0.764645	3.66819	4.38143	2.2622	2.51854
LOC100505942	0.269123		1.56238		2.53741
LOC100506022	0.140199	1.10149	0.906737	2.97391	2.69321
LOC100506860	3.21844	1.11068		-1.53492
LOC100507002	8.62662		2.17818		-1.98567
LOC101927045	0.313165		0.960427		1.61675
LOC101927599	1.21731	7.91317		2.70055
LOC101927621	5.50397	37.8997		2.78364
LOC101929010	0		1.15803		#DIV/0!
LOC102723769	0.472599		1.59409		1.75405
LOC102724094	6.03905		30.534		2.33802
LOC102724224	0.642993		2.56832		1.99795
LOC115110	0.0918133		1.0397		3.50132
LOC158960	2.33149		6.63239		1.50828
LOC254896	0.153338		0.874359		2.51151
LOC283070	5.06798		1.71665		-1.56181
LOC284023	1.60372		7.90122		2.30065
LOC642361	0.531624		1.94972		1.87479
LOC654342	9.87278		33.4864		1.76205
LOC728752	2.06164	12.9761		2.65399
LOXL1	0.760177		2.16511		1.51003
LPHN2	0		1.9563		#DIV/0!
LPIN3	3.54892		11.4046		1.68417
LRP1	3.2792		15.4902		2.23994
LRRC29	0.655968		2.42951		1.88897
LRRCC1	1.9903	0.352252		-2.49831
LY6K	0.108584		1.64849		3.92427
LY96	0		0.689073		#DIV/0!
LYPD1	0.192362		1.03585		2.42891
LYPD5	0.516609		1.67247		1.69484
LYPLAL1	15.4041		4.61644		-1.73846
LYPLAL1-AS1	5.33297	1.16184		-2.19853
LYST	0.811918		2.68448		1.72524
MAGEB17	3.57973		0		#DIV/0!
MAML3	0.772659		0.242282		-1.67314
MAP1B	5.74437		0.039058		-7.20039
MAP3K1	5.626	17.1368	1.51885	1.60692	-1.88913
MAP3K7CL	0.0976946		1.18457		3.59993
MAP3K8	0.960182	3.22618		1.74845
MAP7D3	10.1522	0.948854		-3.41946
MAPK8IP1	1.04069		0.305534		-1.76814
MAPK8IP2	0.105364		0.893483		3.08405
MAPRE2	17.7878		3.88449		-2.1951
MARCH3	1.19285		0.271524		-2.13525
MARCKS	5.89276	1.51882		-1.95599
MARVELD3	2.71352		0.160949		-4.07549
MAST4	0.691705		2.95181		2.09337
MBNL3	0.791887		0.120549		-2.71568
MC1R	0.765053	2.28652		1.57952
MCTP2	1.8636		0.38925		-2.25932
MEGF6	0.173454		1.48166		3.09459
MEIS3	19.2521		54.9905		1.51417
MESP1	12.466		37.5432		1.59055
MEST	24.1545		3.47867		-2.79568
MGAT5B	0.135823	0.70547		2.37686
MGLL	4.89986	34.5453	84.1728	2.81768	4.10254
MIB2	4.45554		13.2554		1.57291
MICAL2	19.2578		61.5144		1.67548
MICALCL	0.265638		0.925891		1.80138
MIR614	0		297.894		#DIV/0!
MITF	3.02948	13.9505		2.20317
MLLT11	6.46093	0.238088		-4.76217
MMAA	0.724763		0.210881		-1.78108
MMP24	0.273463		1.02933		1.91228
MMRN2	0.157443		0.943954		2.58389
MND1	18.102		6.33695		-1.51429
MOB3B	1.7191		0.469191		-1.87341
MOK	3.02166		34.664		3.52002
MPP7	0.966782		0.233712		-2.04846
MPZL3	2.96692		0.276952		-3.42126
MR1	0.65279		3.04939		2.22383
MSH6	23.1772		4.28522		-2.43527
MSLN	0		4.35321		#DIV/0!
MSRA	2.31984		8.36057		1.84958
MSX1	13.7219	62.5977		2.18963
MT1DP	0		1.53735		#DIV/0!
MT1L	174.073	35.4799		-2.29461
MT2A	307.545	63.965	1109.31	-2.26544	1.8508
MVP	5.2773	21.3985	84.3617	2.01964	3.99872
MXRA8	0.18993		1.33883		2.81744
MYB	6.30322		1.70184		-1.889
MYBL1	0.670503		7.74308		3.52959
MYD88	2.97419		9.54737		1.68261
MYEOV	14.4528		62.5859		2.11449
MYL5	2.41043		7.98514		1.72803
MYO1D	4.45927		1.00577		-2.14851
MYO5B	2.02401		0.708153		-1.51509
MYOF	19.6972		139.588		2.82511
MYRF	2.26383		0.127866		-4.14606
NAV3	11.5961		2.99938		-1.9509
NCEH1	2.45739		15.0482		2.61439
NCK1-AS1	1.07233		0.304423		-1.81659
NDRG1	7.85603	24.3203	37.1083	1.63029	2.23987
NDRG4	8.10797	1.29071		-2.65117
NEDD4L	9.32828		33.7343		1.85454
NET1	28.9975		82.8252		1.51414
NINJ2	1.49985	4.57079		1.60762
NLRP1	0.158479		6.35253		5.32497
NLRP10	0		24.4451		#DIV/0!
NMU	18.7715		5.50848		-1.76882
NNMT	30.6646	95.1271	0	1.63328	#DIV/0!
NOXA1	0.475141		2.19875		2.21026
NOXO1	0.480049		1.50209		1.64572
NPAS1	0.271881		1.33662		2.29754
NPAS2	3.03974		0.29636		-3.35853
NPTXR	0.398747	1.45688		1.86933
NREP	0.710879		0		#DIV/0!
NRG1	0.302059	1.64844		2.4482
NRG4	0.773408		0.126482		-2.6123
NRP2	6.95187		1.22265		-2.50739
NT5E	0.0833196	0.736274	22.4918	3.14351	8.07653
NT5M	6.93224	1.94108		-1.83646
NTNG2	1.15055	0.394083		-1.54575
NUAK2	0.517118	2.73398		2.40244
NXN	19.2566		4.65191		-2.04946
OAS2	0		0.804726		#DIV/0!
OASL	0.190529		0.885364		2.21626
OGFRL1	56.4626		13.0427		-2.11406
OPRL1	1.35399		4.06871		1.58735
P2RY2	0.932462		0.271067		-1.7824
PAPL	11.5828	0.61897		-4.22597
PAQR5	1.64449		0.0587178		-4.8077
PARD6B	2.33538		0.76661		-1.60709
PARP10	3.09638		25.3528		3.03349
PARP3	5.40085		26.2269		2.27979
PAX8	0.445932		1.55657		1.80347
PCDH18	0.144375	0.71707		2.3123
PCDHAC2	0.410997	1.53974		1.90549
PCDHB11	3.1752		1.05978		-1.58308
PCLO	0.159132	1.70111		3.41818
PCSK5	2.45047		0.625078		-1.97095
PDE4D	5.36502		0.335989		-3.9971
PDE5A	0.953968		0.264456		-1.85091
PDE7B	10.8762		0.281184		-5.27351
PDP1	37.6038	108.056		1.52283
PEAR1	0.422412		3.93749		3.22056
PEX11G	0.654408		2.23903		1.77461
PEX2	10.8329		3.38522		-1.67809
PHLDB2	6.7861	19.4209		1.51696
PICK1	23.5398		5.33799		-2.14074
PIK3IP1	1.11419	3.24637	4.6459	1.54284	2.05997
PINK1	21.7415		63.7197		1.55129
PKI55	0.516158		1.54747		1.58403
PKP2	14.2899		2.80691		-2.34794
PLA2G3	0.233458	1.4507		2.63551
PLA2G4C	0.0732726		0.886421		3.59665
PLAC1	0.463212	2.46309		2.41072
PLAC8	0.213432	33.7684		7.30576
PLAT	1.82662		58.4804		5.0007
PLAU	11.6391		185.001		3.99048
PLAUR	54.3467		251.855		2.21233
PLCD3	10.1292	30.3284		1.58215
PLCXD2	2.77163		25.4727		3.20014
PLEC	37.3318		321.227		3.10512
PLEKHA4	1.73747	0.120111	10.0796	-3.85455	2.53638
PLIN3	72.258		319.03		2.14246
PLK2	0.228397	31.4198	71.7986	7.10399	8.29627
PLK3	12.785		39.3245		1.62098
PLLP	2.81579	13.9426		2.30789
PLS1	11.7908		4.10843		-1.521
PLSCR3	7.83117		22.4397		1.51876
PLXNA2	1.91938		8.35595		2.12216
PLXNB3	0.0947346		1.9725		4.37999
PMEPA1	0.950166		0.124035		-2.93743
PNPLA6	28.9654	8.10895		-1.83674
PNPLA7	0.257606		1.79497		2.80072
PODXL	19.6292		173.773		3.14613
PON3	1.19769		0		#DIV/0!
POU2F2	0.088594		3.00749		5.08521
PPM1N	1.02549		3.4469		1.74899
PPME1	40.2229	160.166		1.99348
PPP1R18	26.0715		97.8075		1.90747
PPP1R26-AS1	0.482471		2.66534		2.46581
PPP1R3F	0.339272		1.21686		1.84265
PPP3CA	1.63096		6.90545		2.08202
PRDM1	0.445303		2.14628		2.26898
PRDM8	2.72632	0.518198	11.8161	-2.39538	2.11572
PRKCDBP	2.40451		20.4224		3.08634
PRODH	1.62803	5.40229		1.73044
PROSER2	3.55612		12.925		1.86178
PRRT4	7.06271		1.13223		-2.64105
PRSS12	3.12777		0.124142		-4.65507
PRSS22	2.98796	0.262161	13.5024	-3.51064	2.17598
PRSS3	53.4713	17.2306		-1.63379
PRTFDC1	13.3293		4.5411		-1.55349
PSCA	0.142768		1.26857		3.15145
PSG6	0		0.751377		#DIV/0!
PSG9	0.10066		40.6624		8.65806
PTCHD4	0.257969	0.759554	1.19142	1.55796	2.20742
PTK6	0.898052		8.17061		3.18557
PTPLA	1.06314		3.16874		1.57558
PTPRE	1.16099	0	3.96634	#DIV/0!	1.77246
PTPRH	0.177388		1.69094		3.25285
PXN	27.8156		110.707		1.99278
RAB17	9.17482		0		#DIV/0!
RAB20	44.3925		4.5617		-3.28267
RAC2	0		0.859906		#DIV/0!
RANBP17	0.0934882		0.726662		2.95843
RAP2B	7.84288		33.1573		2.07987
RAPGEF5	4.28239		1.44939		-1.56297
RAPH1	0.480722	2.63655	1.37935	2.45538	1.52072
RASGRP1	1.71561		0.25915		-2.72686
RASGRP2	3.6282		1.12449		-1.68998
RASSF5	3.22015		0.66692		-2.27154
RBMS1	0.34293	1.17853		1.781
RGL1	1.14856		4.81772		2.06853
RGMB	7.11866	2.22243	30.4143	-1.67947	2.09507
RGMB-AS1	0.995879		6.80172		2.77186
RGS20	0.309667	1.13706		1.87652
RGS3	12.7716		58.3298		2.1913
RGS4	13.7916	1.37761	311.506	-3.32355	4.4974
RGS9BP	0.524954		1.54941		1.56146
RHOBTB1	1.403		0		#DIV/0!
RHOBTB3	31.2087		2.79136		-3.48291
RIMKLA	1.57228		0.358077		-2.13451
RINL	0.185367		1.94382		3.39044
RND2	1.39921	4.55954		1.70428
RNF182	0		0.720273		#DIV/0!
ROBO1	3.74262	1.24162		-1.59182
ROBO3	1.90766		6.46361		1.76053
RPL13AP20	4.08032	13.2039		1.69421
RPL23AP53	1.32195		3.83211		1.53547
RRP15	6.4258	1.69585	0.849113	-1.92187	-2.91985
S100A11	116.406		457.756		1.97542
S100A13	170.025		505.879		1.57304
S100A16	208.567	0	917.973	#DIV/0!	2.13794
S100A2	9.68706	1.63316	919.409	-2.56839	6.56851
S100A3	0.392037		20.8408		5.73228
S100A6	238.435		1576.74		2.72528
SAMD9L	0.0602868		1.40286		4.54038
SCARF1	0.180059		0.82066		2.18832
SCNN1D	0.171159		0.877812		2.35858
SECTM1	3.55736	10.8716	19.7032	1.61168	2.46956
SEL1L3	22.9572		4.36835		-2.39378
SEMA3B	0.694883	4.01682	5.78138	2.53121	3.05657
SEMA3C	0.109079	2.71684	1.82008	4.63849	4.06056
SEMA3D	4.66925	0.0598242	1.16404	-6.28632	-2.00405
SEPT4	0.101452		2.78776		4.78024
SERPINB8	2.98148		11.1286		1.90018
SERPINB9	10.5537	0.694765		-3.92508
SERPINB9P1	0.482217		1.58915		1.7205
SERPINE1	135.499	0.103917		-10.3486
SERTAD4-AS1	1.52521		0		#DIV/0!
SETBP1	0.0744313	1.81228		4.60576
SGK1	2.84401		28.4047		3.32013
SGK223	2.33524	7.1346		1.61126
SH2B3	16.189		49.9933		1.62672
SH2D2A	1.86838		7.57308		2.01909
SH2D3A	14.5751		1.24028		-3.55477
SH2D4A	3.05972		0.712299		-2.10285
SH2D5	0.200558		1.77513		3.14583
SH3PXD2A	0.645635		2.49482		1.95015
SH3RF2	7.85196		0.543441		-3.85286
SH3TC2	1.03085	0.0686796	16.4699	-3.90781	3.99792
SHROOM3	0.146782	0.842154		2.52041
SIRPB1	0		8.13625		#DIV/0!
SIRPD	0		1.22821		#DIV/0!
SIRPG	0		0.938461		#DIV/0!
SLC16A10	3.88683		1.19364		-1.70323
SLC16A2	2.48519		15.3124		2.62327
SLC19A2	6.93377		2.38145		-1.5418
SLC1A3	10.1106		0		#DIV/0!
SLC20A1	9.93208		47.5734		2.25999
SLC22A4	0.483858		1.38284		1.51498
SLC25A45	0.959883		3.09544		1.68921
SLC26A1	1.11218		3.23382		1.53985
SLC27A2	18.073		3.86829		-2.22407
SLC2A6	19.8228		62.1824		1.64935
SLC38A2	17.9877		77.9873		2.11623
SLC45A1	1.1875		3.87643		1.7068
SLC46A3	4.34627	1.00474		-2.11296
SLC7A11	4.17619		0.857227		-2.28444
SLC7A2	6.46783		0.792582		-3.02865
SLC9A1	2.81853	0.86386		-1.70608
SLC9A2	0.821763		0		#DIV/0!
SMAD6	0.903828	4.51082		2.31927
SMAD7	2.4076		0.450946		-2.41657
SMNDC1	8.38101	1.75593		-2.25489
SMPDL3B	10.0089		1.50993		-2.72874
SMURF2	34.9461	11.4269	103.846	-1.6127	1.57125
SNAI3-AS1	0.650889		3.38855		2.38019
SNORA37	338.133		1142.17		1.75612
SNORD18B	29.343	125.626		2.09805
SNORD36A	130.747	0		#DIV/0!
SNORD36B	55.8485		191.886		1.78066
SNORD37	108.256	0	0	#DIV/0!	#DIV/0!
SNORD43	390.565	0		#DIV/0!
SNORD93	70.5088		0		#DIV/0!
SNORD96A	152.885	0		#DIV/0!
SNX19	2.9732	0	9.08137	#DIV/0!	1.6109
SOGA1	0.400905		3.18571		2.99028
SOX4	22.0995		4.96021		-2.15554
SP140L	2.07705		6.54657		1.6562
SP5	2.31034		0.0956243		-4.59458
SPATC1	0.251798		0.73503		1.54554
SPOCD1	0.157777		2.28684		3.8574
SPRY1	2.87107		0.789003		-1.86349
SPRY2	38.9525		6.53316		-2.57586
SPRY4	20.4377	5.52606	67.7559	-1.88691	1.72911
SPTBN4	0.251084		1.60767		2.67872
SRGAP1	0.68718	2.52753		1.87897
SRP72	20.2667		6.20492		-1.70763
SRPX	5.36933	0		#DIV/0!
SSBP2	1.12428	0.334364		-1.74951
ST3GAL5	3.38914		0.862192		-1.97484
STAP2	2.84798	0.172872	17.6987	-4.04216	2.63563
STK32C	2.40083		7.98792		1.73428
STON2	0.236209	0.83172		1.81603
STOX2	0.789606		0.271497		-1.5402
STS	0.373833		1.10231		1.56007
STX1A	5.44481		19.1122		1.81154
STXBP2	9.81474		0		#DIV/0!
STXBP6	1.13435	21.5225		4.24591
SUGCT	0.298237	2.54579		3.09358
SUN3	1.41274	0.155368	4.56956	-3.18474	1.69356
SUSD2	2.31942	0.347203	0.154152	-2.73991	-3.91134
SYNE4	9.10942		0.217914		-5.38553
SYT1	0		1.25272		#DIV/0!
SYT7	2.34431		0.61419		-1.93241
SYTL1	8.62937	2.39545		-1.84896
TADA1	10.2812		2.95644		-1.79808
TAGLN	103.062	298.421	21.7634	1.53384	-2.24353
TAOK3	1.854		6.45633		1.80007
TBC1D2	9.93193	36.9963	85.3731	1.89723	3.10364
TBX1	0.225834		0.77213		1.77358
TBXA2R	1.14008		4.14284		1.86148
TENM3	0.778105		0.208797		-1.89786
TFAP2A	0.960574	2.78425	10.1513	1.53532	3.40162
TFAP2A-AS1	0.763478		5.90197		2.95054
TFPI	2.61005	0		#DIV/0!
TGFB1I1	10.8552	33.1629		1.61118
THBS3	0.678628		2.60698		1.94168
THSD1	2.63236		53.2736		4.33899
TJP2	19.9568		2.55236		-2.96697
TLDC1	3.97437		15.9142		2.00151
TLE1	9.88444	29.8323		1.59364
TLE6	1.11842		4.25234		1.9268
TLR3	1.90743		0.543148		-1.81221
TLR6	1.1435	0.291327		-1.97275
TM4SF1	4.43142	0	116.439	#DIV/0!	4.71566
TM4SF19	28.3104	0.529045		-5.7418
TMC5	3.37968		1.05429		-1.68061
TMEM158	13.302		60.171		2.17742
TMEM191B	0.978989	3.42745		1.80777
TMEM194B	4.87826	0	30.4466	#DIV/0!	2.64184
TMEM2	3.33869	11.8731		1.83034
TMEM52	33.945		10.2131		-1.73278
TMSB4X	157.346	1526.84	1117.88	3.27854	2.82875
TNFRSF14	4.86803	0	40.6903	#DIV/0!	3.06327
TNFRSF21	66.9182		6.42941		-3.37964
TNRC6C-AS1	0.773039		2.24994		1.54127
TNS4	15.2718		1.00363		-3.92756
TOM1L2	5.26023		18.0582		1.77945
TP53I3	17.556		100.533		2.51764
TP53INP1	0.741215		3.69872		2.31906
TPGS1	1.83546		9.32041		2.34425
TPM2	6.36507		23.8069		1.90313
TRAF1	0.504203		1.52494		1.59668
TRIM16	2.79318	8.45553		1.59799
TRIM22	0.0756619		2.45418		5.01953
TRIM34	0.453553		1.82332		2.00723
TRIM38	2.14391		7.04213		1.71577
TRIM72	2.62188		10.5928		2.01441
TRIML2	0	4.00466		#DIV/0!
TRPV2	0.166648		1.1198		2.74837
TST	34.861		103.486		1.56975
TTC28-AS1	6.46656		2.15755		-1.58361
TTC9	0.765061		0.12492		-2.61457
TTLL7	1.02591	0.315379		-1.70174
TUBA1A	44.0774	157.949		1.84135
TUBA4A	148.965		45.2705		-1.71833
TUBA8	12.8617		3.84314		-1.74273
TUBAL3	0.104167		1.47113		3.81996
UAP1	73.776		241.887		1.71311
UBA5	8.4682	2.17683		-1.95983
UCA1	4.49342	13.255		1.56065
UNC5B	4.46523		1.02312		-2.12575
UPP1	167.028	18.952		-3.13967
UQCC2	68.4576		18.7904		-1.86522
UTS2	0.758287	0	2.37499	#DIV/0!	1.64711
VAMP1	1.79088	6.70151		1.90382
VDR	5.80389		0.824864		-2.81479
VIM	1.51245	8.90945	28.0411	2.55845	4.21259
VWA1	3.1431		0.0410867		-6.25737
WDR63	0.131111		1.37987		3.39567
WNT11	12.1516		3.7251		-1.70579
XDH	0		46.7652		#DIV/0!
XIST	0.405455		1.22079		1.5902
XK	2.22466	0.476957	0.367406	-2.22165	-2.59814
ZBTB20	0.954863	0.133129	4.42325	-2.84247	2.21174
ZDHHC14	1.31551		3.80649		1.53284
ZEB1	2.68461		17.0075		2.66339
ZFP14	1.02215	6.30375		2.6246
ZFP28	0.925468	4.60917	2.88871	2.31625	1.64217
ZFP30	3.92353	30.6958		2.96781
ZFP36L2	3.66007		28.7749		2.97487
ZFP82	0.626948		4.73468		2.91685
ZMIZ2	7.26088		21.2574		1.54975
ZMYND8	4.39468		13.8936		1.66059
ZNF100	4.23793	14.7817		1.80238
ZNF204P	2.36947		0.654058		-1.85707
ZNF217	3.17808		13.4706		2.08358
ZNF260	4.1883	26.4697		2.6599
ZNF271	23.8473		5.71364		-2.06134
ZNF283	4.58597	13.4461		1.55188
ZNF331	1.10042	5.05437		2.19948
ZNF345	0.795863	7.66529		3.26775
ZNF397	19.0564		4.61608		-2.04554
ZNF425	0.489016		1.68913		1.78832
ZNF438	0.752365		20.8063		4.78944
ZNF45	5.33402	18.1086		1.76338
ZNF461	0.155176	0.969243		2.64295
ZNF467	0.51712	1.79378		1.79443
ZNF471	0.211484	3.71541	1.63807	4.1349	2.95337
ZNF474	2.54467		0.142838		-4.15502
ZNF490	2.2838	8.04084		1.81591
ZNF527	1.29263	5.60226		2.1157
ZNF529	1.2204	4.78157		1.97013
ZNF540	0.718056	5.5094		2.93973
ZNF566	2.1732	14.78		2.76575
ZNF568	0.150825	0.95719		2.66593
ZNF569	0.467283	5.6236		3.58913
ZNF571	2.00472	12.873		2.68288
ZNF573	1.24369	3.72337		1.58198
ZNF583	2.91965	43.2181	11.9196	3.88777	2.02947
ZNF607	3.56486	54.1044		3.92383
ZNF620	1.4544		0.480426		-1.59803
ZNF672	92.6246	24.6634		-1.90902
ZNF699	2.56704	14.4402		2.49191
ZNF704	1.99477		0.294097		-2.76186
ZNF71	16.2963	171.033		3.39166
ZNF790	2.04778	6.14043		1.58428
ZNF850	4.22931	25.9251		2.61586
ZNF878	3.08279		0.961898		-1.68028
ZNF91	4.69409		13.4756		1.52143
ZSWIM3	2.23472		7.51036		1.74879
1The expression level for each gene is shown only for those clones that are above or below the threshold. 2The 29 genes whose average fold change in expression is regulated in the same direction in RKO KMT2CinsG cells are in bold.

## Sheet: Table S5
Table S5. Genes differentially expressed more than 1.5 log2 fold in HCT116 cells following restoration of KMT2C expression.
Gene2	HCT116 FPKM	KMT2CinsG			KI1 log2 fold change in expression	KI2 log2 fold change in expression	KI3 log2 fold change in expression
		KI1 FPKM1	KI2 FPKM1	KI3 FPKM1
ADAMTS16	0.416421		1.43449	1.45324		1.78442	1.80316
ANK1	0.653437		2.57494			1.97842
EBI3	1.07581			5.05729			2.23294
FAM198B	0.263024	0.811213		1.14633	1.62489		2.12376
FGF9	0.196571		0.831368			2.08043
GEM	13.0118			2.65194			-2.29471
HIST1H2BG	2.27298			0			#DIV/0!
HKDC1	0.82123		3.85052	5.31554		2.2292	2.69436
IRS1	34.5018			10.9368			-1.65747
LTBP2	0.823417			2.55321			1.63262
MAML2	0.480072		2.41357			2.32985
MB21D2	2.19921			7.88337			1.84183
NOTUM	19.2551		6.79312			-1.50309
NRP1	0.81062			7.03143			3.11672
PRSS23	1.50184		6.94359	7.17902		2.20895	2.25706
RGS16	3.04707			0.842713			-1.85431
SAMD9	0.610907			2.19202			1.84324
SATB1	0.938047			0.100944			-3.21611
SEMA3A	1.84512	0.616769	0.530726		-1.58091	-1.79767
SLC23A3	0.326481	1.1288			1.78972
SLC2A3	1.33242	0.370932			-1.84482
SYK	2.16043	0.104923	0.111627		-4.36391	-4.27456
TERT	1.93656			0.322074			-2.58803
TSPAN1	5.8564		19.1204			1.70703
UBA7	0.314299			1.14574			1.86607
UNC13D	3.40985			11.6811			1.77639
VEPH1	0.381937		2.10623			2.46326
WFIKKN1	2.26353		0.25126			-3.17132
ZNF711	1.23801			0.310566			-1.99505
ACVRL1	0.83811			2.71614			1.69635
ALDH3A1	1.40767			0			#DIV/0!
AMOT	1.36463			0.365265			-1.90149
ANO10	4.8826	1.52994			-1.67417
ANXA1	135.538			385.03			1.50627
ANXA10	6.12898	19.3132	0		1.65587	#DIV/0!
APOBEC3B	12.3372			39.1023			1.66424
APOBEC3H	1.14358		3.80767			1.73535
ARAF	26.5046			6.44988			-2.0389
ARHGDIB	1.01553			5.55792			2.45231
ARL4C	5.05694			21.2436			2.07069
ARRDC4	1.64588			0.536589			-1.61697
ASGR1	1.70515		0.296359	0.437727		-2.52448	-1.96179
ASIC4	0.926707			0.294344			-1.65461
B3GALT5	0.151021			0.804674			2.41365
B3GNT9	3.54418			0.957947			-1.88744
BAMBI	1.98142			6.76875			1.77235
BCAM	14.0993		4.67761			-1.59178
BCRP2	0.956057		0.288097			-1.73054
BEAN1	0.851082			0.191166			-2.15448
BEX4	1.00832			0			#DIV/0!
BMP4	169.37	495.766		610.249	1.54948		1.84922
C15orf52	0.447192			1.37845			1.62408
C15orf59	1.78771		0.460888			-1.95563
C1orf106	6.09347	1.80516			-1.75514
C1orf226	3.21751	9.69922			1.59192
C9orf3	2.63374		8.67059			1.71902
CA11	35.2556		12.4556	11.3862		-1.50106	-1.63056
CA2	9.71243		2.99636	2.87667		-1.69662	-1.75543
CA9	0.455976			2.58773			2.50466
CABP1	0.962656			8.48473			3.13978
CACNB4	0.112851			0.846094			2.9064
CALB2	5.79364			2.04125			-1.50502
CASP4	12.3572			3.88574			-1.66909
CBWD3	0.53754		1.6005			1.57408
CCDC102B	0.215778	1.02566			2.24894
CCDC146	0.434282		1.23322			1.50573
CD33	3.16741			0.717596			-2.14206
CD58	3.25454		9.22033			1.50236
CD74	0.361115			2.03161			2.49209
CDC42BPA	7.93981			24.8954			1.6487
CDC42EP5	1.02973		0			#DIV/0!
CEMIP	1.48101		4.36401	7.11474		1.55907	2.26423
CENPQ	2.76183		8.85401			1.68071
CITED4	2.36923			6.9005			1.54228
CLCNKB	1.3652	0.200751			-2.76563
CMPK2	0.546641			1.63237			1.5783
COL12A1	9.82439	2.8509			-1.78495
COL13A1	7.25197			20.8773			1.52549
COL17A1	1.87221			30.6208			4.0317
CPA4	9.01619	2.64952			-1.76679
CRNDE	1.05			0			#DIV/0!
CRYBA1	0		9.54276			#DIV/0!
CSTA	4.6751			1.45044			-1.6885
CTAGE8	1.61606		0.512825			-1.65595
CTGF	0.362624		1.39345	1.15013		1.94211	1.66526
CXXC1	32.1884		10.7458			-1.58277
CYB5B	152.6			39.1497			-1.96268
CYP27B1	6.34965			2.21206			-1.52128
CYP4F12	0.64003			5.77297			3.1731
DDX19B	22.9626			8.08913			-1.50523
DENND2A	0.296322			0.874707			1.56164
DEPTOR	2.90506			0.665605			-2.12583
DISC1	1.02487	0.238909	0		-2.10091	#DIV/0!
DKKL1	3.88692	1.19331			-1.70366
DNER	0.326405		1.54356	4.98191		2.24153	3.93196
DOK3	0.448206			1.98703			2.14838
DOK4	16.8924			5.9514			-1.50507
DPEP1	3.98558	0.273734			-3.86394
DPP4	1.77877			0.332985			-2.41735
DRAXIN	1.36711	0.440949	0.446779		-1.63244	-1.61349
DRD1	0.392939			3.02476			2.94444
EBF4	3.57674		1.00417			-1.83263
EFHD2	55.2927			163.509			1.56421
EHF	9.77455	0.324925			-4.91085
ENKD1	21.1502			0.387956			-5.76863
ETV7	2.44703			0.596909			-2.03545
EVA1A	2.05278	0.306747	0.326344	5.84054	-2.74245	-2.65311	1.50853
F3	10.2336			52.3004			2.35351
FAM203A	1.20615		0.414441	0.33389		-1.54117	-1.85297
FAM221A	1.74125	0.25545		0	-2.76901		#DIV/0!
FAM24B	5.14017		1.76537			-1.54185
FGF8	2.91026		0.670356			-2.11815
FGFBP1	10.6255		38.8531			1.8705
FHOD1	14.055			3.0701			-2.19473
FLOT1	52.7729			17.9896			-1.55263
FRMD4B	0.324871			2.04861			2.65671
FSD1	26.8969		8.8538			-1.60307
FUT8	5.47414			16.048			1.55169
GAL3ST1	1.72984	0.560515		0.407765	-1.62582		-2.08483
GATA2	8.46068		2.73986			-1.62667
GCNT3	1.15645			0.192474			-2.58696
GGT1	7.20778			1.77045			-2.02544
GJB4	1.6841	0.487764			-1.78772
GLIS3	0.190527		0.765946	8.4587		2.00725	5.47237
GNRH2	0			1.31095			#DIV/0!
GPR133	0.18303		1.20245			2.71583
GPR162	4.53175		1.21351			-1.90089
GPR20	1.90463		0.397565	0.538273		-2.26025	-1.8231
GPT2	21.9501			7.49599			-1.55004
GRIK4	0.271638	0.832159			1.61517
HBA2	1.48291		0			#DIV/0!
HDAC9	0.515967			2.32083			2.16929
HEG1	0.402263			1.25231			1.63838
HIST1H2BM	255.354	744.954			1.54465
HIST1H3C	3.68755	12.2954			1.73738
HIST1H4H	417.576			119.928			-1.79987
HIST2H2BA	2.24611	9.78462	9.79406	6.61299	2.12309	2.12448	1.55787
HIVEP3	2.29513			6.49519			1.5008
HLA-DMB	2.40361			0.48792			-2.30049
HLA-DRA	1.04952			3.35591			1.67698
HMGCS1	4.94777		14.036			1.50428
HNF1B	1.65047	0.526082			-1.64952
HNF4A	3.91597	1.11024			-1.8185
HOXD8	1.63428		0.499122			-1.71119
HPD	1.21333	0.174979		4.08558	-2.79372		1.75157
HSD11B2	5.49819			1.00279			-2.45494
ICAM1	4.28586		0.893687			-2.26174
ID2	92.6546		31.4807			-1.55739
IFI27	4.0005		0.58245			-2.77998
IL11	0.982038		0.306641			-1.67923
IL32	3.13484			1.02724			-1.60962
INHBB	0.286925			3.13128			3.44801
INPP4B	4.35778		13.0879	12.6838		1.58658	1.54133
INSIG1	14.6996		49.362			1.74762
IRX3	1.28846			0.215386			-2.58065
IRX5	0.849355			0			#DIV/0!
ISG20	9.58698		3.14031			-1.61017
ISM1	0.29198			1.35571			2.21511
ITGB8	0.347763		0.992813	1.06578		1.51342	1.61573
ITGBL1	0.317805			1.30634			2.03932
KCND3	0.350815			1.24873			1.83168
KIAA1549L	0.133939			1.10129			3.03955
KLHDC9	1.78593	0.446594			-1.99964
KLHL35	1.55207			0.186625			-3.05598
KRT13	1.21768		0.412976			-1.56
KRT20	1.05193		3.77658			1.84404
KRT23	13.8089			1.48445			-3.2176
KRT7	31.0561	3.82644			-3.02081
KRT80	1.15917	3.45254		21.0008	1.57457		4.17928
KRT81	0.277194			5.53875			4.32059
KRT86	0.28535			3.19017			3.48283
KRTAP2-3	0.961994		6.60999			2.78055
LAMA4	1.49521		0.3067	0.0542717		-2.28545	-4.78401
LARGE	0.293193			3.38944			3.53112
LCN2	1.49738		10.6064	11.2793		2.82442	2.91316
LCP1	0.20504		0.978341			2.25443
LEMD1	10.4509			3.40704			-1.61704
LETM2	0.775287		2.28404			1.55879
LGALS9	0.353151			2.44827			2.79341
LGR4	0.630752		2.17448			1.78552
LHFP	0.295725		1.25604			2.08656
LIMCH1	1.85618		0.474157			-1.9689
LIN7A	2.22916			0.756176			-1.55971
LINC00174	0.217771	0.820601			1.91387
LINC00326	0.849576		3.64038	3.45655		2.09927	2.02452
LINC00511	0.542049			1.759			1.69826
LOC100131138	39.0922	2.50297		137.248	-3.96517		1.81183
LOC101927204	0.455604			1.42661			1.64674
LOC101928100	1.92513			0.443867			-2.11676
LOC101929372	1.62728		0.536294			-1.60137
LOC102723354	1.40135		4.25316			1.60172
LOC388553	1.86911		6.61473			1.82333
LOC389602	0.335626			1.11058			1.72639
LRG1	1.67258	0.501707	5.72678		-1.73716	1.77565
LRRC27	3.54567		1.07621			-1.7201
LTN1	0.827652			4.48748			2.43881
LURAP1L	0.926928			0.130233			-2.83137
LYL1	2.3154		0			#DIV/0!
LYRM1	6.83444		20.372			1.5757
MAGEB1	1.65916	0		0	#DIV/0!		#DIV/0!
MALT1	5.95055		20.1989	26.1279		1.76318	2.1345
MAP1B	1.51831		4.65038			1.61488
MAP4K1	1.33693		0.279459			-2.25821
MB	0.998835			2.95761			1.56611
MBNL3	0.2381	0.823254			1.78977
MCAM	27.5854			8.09573			-1.76867
MDGA1	1.52279		0.514199			-1.56632
MINOS1-NBL1	17.8263		1.82304			-3.28959
MIR210HG	1.36136		0.459401			-1.56722
MIR6723	3039.16	9434.88			1.63433
MLKL	4.13409			0.694911			-2.57267
MMP14	13.4687			0.267487			-5.65399
MNS1	0.673152		1.97551			1.55322
MON1B	13.1115			1.90488			-2.78306
MSMO1	7.34897		26.8781			1.87082
MSX2	5.66728			20.5123			1.85576
MTMR1	5.98633		1.38736			-2.10933
MUM1L1	1.93672			0.29377			-2.72086
MYL2	1.12796		5.31396	3.20146		2.23607	1.50501
MYRIP	0.194777	0.962099			2.30436
NCALD	0.179549	0.945703			2.39701
NFAT5	4.8941			1.58066			-1.63052
NKAIN1	2.07047			0.119127			-4.11938
NKD1	3.11826			0.974448			-1.67808
NOB1	108.204			36.2436			-1.57795
NOG	0.303042		1.29791			2.0986
NPAS1	1.47886		0.428938			-1.78564
NR2F1	25.0859			6.95168			-1.85144
NRP2	0.410278		1.25529			1.61334
NTRK1	0.926802	0.292446			-1.66409
NUGGC	0.920192		0.238148			-1.95007
NWD1	0.210824		0.924381	1.57607		2.13245	2.90222
OAS1	0.495691	1.91873	1.63423		1.95264	1.7211
OSER1-AS1	2.18898		0.42482			-2.36534
OSGIN1	22.0884			7.56826			-1.54526
PALM3	2.24571		0.511633			-2.13399
PARD6A	7.78675			2.20424			-1.82074
PBX1	1.8542	5.43401	0.186506	0.147567	1.55122	-3.3135	-3.65135
PCOLCE2	5.36135	1.84075			-1.5423
PDGFB	7.48234			23.181			1.63138
PDLIM3	8.43515			2.91085			-1.53497
PEG10	3.60614			1.19222			-1.5968
PIK3IP1	1.91769	0.56657			-1.75904
PKIB	6.78378	1.7042	2.01844		-1.993	-1.74885
PLCL2	0.957952			0.172776			-2.47105
PLEKHA2	2.36102			8.1508			1.78753
PLEKHG4	16.4917			4.73393			-1.80063
POT1	2.32485			0.785062			-1.56626
PPAP2B	1.90813		0.649825	0.166921		-1.55403	-3.51492
PRF1	7.62088	1.4593			-2.38468
PRICKLE1	0.442266		1.29213	1.81919		1.54677	2.04031
PRIMA1	0.241044	0.803818			1.73757
PRMT7	25.3505			1.74676			-3.85926
PTAFR	1.2772			6.13314			2.26364
RAB27B	0.309205		1.05819	1.52483		1.77496	2.30201
RASD2	0.998051		0.316796			-1.65556
RBAK-RBAKDN	5.51029	1.28027			-2.10569
REEP2	5.86106		1.85282	1.9887		-1.66144	-1.55934
RFESD	1.31053	0.342882			-1.93437
RFTN1	1.88342			0.324028			-2.53916
RGS2	27.8491			3.2166			-3.11402
RGS9	1.80481		0.481871			-1.90513
RHBDL1	2.61915		0.556557			-2.2345
RINL	25.4568	8.56766			-1.57108
RND3	3.1794			0.457552			-2.79675
RNVU1-19	161.406		1768.3			3.45359
RPS4Y1	9.639	0	0	0	#DIV/0!	#DIV/0!	#DIV/0!
RRAD	2.94376			0.973			-1.59715
S100A4	724.348			144.268			-2.32793
SAMD3	2.57346		0.160415			-4.00383
SCD	140.485		520.425			1.88928
SCG2	10.6963	35.79		3.25381	1.74244		-1.71691
SDPR	0.126728		0.921305			2.86195
SELPLG	0.321491		0.965904			1.5871
SERPINA1	0.790712		2.48473	3.62308		1.65187	2.19599
SERPINI1	1.73624			0.39534			-2.1348
SGPP2	0.453405	1.98271			2.1286
SH3BGRL2	1.04867			0.3646			-1.52417
SHD	1.11081			0.327563			-1.76177
SHF	1.38826			0.422991			-1.71458
SLC1A3	6.95353		28.6713			2.04379
SLC38A2	88.4948			26.4674			-1.74138
SLC6A20	0.642575			2.26785			1.81939
SLC7A11	2.32939		8.37162			1.84555
SLC9A5	3.45354			0.972224			-1.82872
SMAD7	0.854473	0.284101		5.17256	-1.58863		2.59777
SMURF2	33.3133		98.2721			1.56069
SNORA8	129.606		451.992			1.80217
SNORD60	458.02		2125.82			2.21454
SPATC1L	1.23602	3.69851			1.58124
SPNS3	0.424219			1.45608			1.77921
SPTBN4	4.9555			1.45809			-1.76495
SSTR5-AS1	8.67665		2.76334			-1.65073
ST3GAL2	9.81931			2.89879			-1.76017
ST6GALNAC3	0.194111			0.850149			2.13084
ST8SIA6	0.693347		2.56719			1.88854
STARD4	3.7482		10.8511			1.53357
SULT1A1	29.7306	6.14313		3.78669	-2.2749		-2.97294
SUN3	0.550301			1.74585			1.66564
SUSD2	6.09903			23.1747			1.9259
SUSD4	0.318536			1.57589			2.30663
SYCE3	3.32253		0			#DIV/0!
SYT5	1.25424	0.426827			-1.55509
SYTL2	2.51515			15.6856			2.64073
TACSTD2	5.09234		20.2229	22.0036		1.98959	2.11134
TCEA3	4.61139			0.702202			-2.71524
TCF21	0.721927	2.05211		2.13712	1.50718		1.56574
TCF25	214.719			65.8081			-1.70611
TCN1	0.425935		2.63513	1.6138		2.62917	1.92176
TENM3	0.0914601			4.15494			5.50554
TERF2	15.8677			4.63729			-1.77474
TESC	44.7309		13.6699	4.38858		-1.71027	-3.34945
TEX19	2.46334		0.809594			-1.60535
THBS1	1.58603		4.61745	13.7212		1.54168	3.11292
TIMP3	0.263362	0.974174			1.88713
TINAGL1	39.8709			173.614			2.12248
TM4SF18	0.142031		2.63211	2.10804		4.21194	3.89162
TMED7-TICAM2	7.88714			2.46008			-1.6808
TMEM133	0.48034		1.69747			1.82126
TMEM139	3.17356			10.0634			1.66494
TMEM154	0.185013		0.960811	0.838574		2.37662	2.18031
TMEM200A	10.3125		1.48948			-2.79152
TMEM231	6.57981			2.29537			-1.51932
TMEM45A	0.837115		2.38328			1.50945
TNFAIP2	18.5539			56.4907			1.60629
TNFRSF19	0.337339	1.32117			1.96954
TNFSF18	0.956078			4.86158			2.34623
TNFSF4	0.24058	2.82724	1.17328	0.807391	3.5548	2.28595	1.74675
TNNC1	6.10746			20.8353			1.77039
TNS3	4.14109			12.9438			1.64418
TRABD2A	2.43945	0.781901	0.79224		-1.6415	-1.62255
TRHDE	1.1396	0.18503		0.230177	-2.62269		-2.30771
TSPAN7	0.731769	4.13372		2.10056	2.49798		1.52131
TUBB3	215.739			20.1908			-3.41752
TWIST1	1.48727	4.39365	6.592		1.56275	2.14805
UPK1A-AS1	18.7959		5.61829			-1.74221
UPK3B	0.705937			2.91453			2.04565
USP28	3.77209	1.02787			-1.8757
VCAN	15.6901	4.53798			-1.78974
VGF	22.2563	5.38871	5.03873		-2.0462	-2.14308
VSNL1	6.16686		33.7241			2.45117
VTRNA2-1	196.406	0			#DIV/0!
WBSCR17	0	10.2387			#DIV/0!
YJEFN3	2.99384		0.644757			-2.21517
ZBED2	4.31931			17.5519			2.02275
ZCCHC12	2.4591			0.747061			-1.71883
ZMYND15	1.29567		0.31589			-2.0362
ZNF222	0.923333			0			#DIV/0!
ZNF280C	1.36307	0.352509			-1.95113
ZNF30	0.913261			0			#DIV/0!
ZNF608	2.40934			6.85878			1.50932
ZNF613	1.05114			0.333557			-1.65595
ZNF821	2.79688			0.828905			-1.75454
1The expression level for each gene is shown only for those clones that are above or below the threshold. 2The 29 genes whose average fold change in expression is regulated in the same direction in RKO KMT2CinsG cells are in bold.

## Sheet: Table S6
Table S6. Overlap analysis with the MSigDB Hallmarks gene set for genes differentially regulated >1.5 log2 fold by restoration of KMT2C expression in RKO and HCT116 cells.
Cell line	Hallmarks gene set categories	# Genes in Gene Set (K)	Description	# Genes in Overlap (k)	k/K	p-value	FDR q-value	Genes
HCT116	HALLMARK_KRAS_SIGNALING_UP	200	Genes up-regulated by KRAS activation.	11	0.055	6.31e-10	3.16e-08	MAP4K1, HDAC9, NRP1, RGS16, TSPAN1, ANXA10, FGF9, LCP1, TSPAN7, HKDC1, ITGBL1
HCT116	HALLMARK_COAGULATION	138	Genes encoding components of blood coagulation system; also up-regulated in platelets.	7	0.0507	1.53e-06	3.83e-05	THBS1, F3, PDGFB, TIMP3, SERPINA1, PRSS23, DPP4
HCT116	HALLMARK_ALLOGRAFT_REJECTION	200	Genes up-regulated during transplant rejection.	7	0.035	1.75e-05	0.000292	MAP4K1, HDAC9 , ICAM1, INHBB, CD74, PRF1, HLA-DMB
HCT116	HALLMARK_TGF_BETA_SIGNALING	54	Genes up-regulated in response to TGFB1 [GeneID=7040].	4	0.0741	6.73e-05	0.000841	THBS1, SMAD7, SMURF2, NOG
HCT116	HALLMARK_HYPOXIA	200	Genes up-regulated in response to low oxygen levels (hypoxia).	6	0.03	0.000165	0.00137	F3, PDGFB, SLC2A3, S100A4, LARGE, TMEM45A
HCT116	HALLMARK_TNFA_SIGNALING_VIA_NFKB	200	Genes regulated by NF-kB in response to TNF [GeneID=7124].	6	0.03	0.000165	0.00137	F3, ICAM1, SLC2A3, GEM, PPAP2B, TNFAIP2
HCT116	HALLMARK_ANGIOGENESIS	36	Genes up-regulated during formation of blood vessels (angiogenesis).	3	0.0833	0.000409	0.00292	NRP1, S100A4, VCAN
HCT116	HALLMARK_EPITHELIAL_MESENCHYMAL_TRANSITION	200	Genes defining epithelial-mesenchymal transition, as in wound healing, fibrosis and metastasis.	5	0.025	0.00132	0.00549	THBS1, TIMP3, GEM, VCAN, SCG2
HCT116	HALLMARK_ESTROGEN_RESPONSE_LATE	200	Genes defining late response to estrogen.	5	0.025	0.00132	0.00549	SERPINA1, PRSS23, LARGE, PDLIM3, TNNC1
HCT116	HALLMARK_INFLAMMATORY_RESPONSE	200	Genes defining inflammatory response.	5	0.025	0.00132	0.00549	RGS16, F3, ICAM1, EBI3, PTAFR
HCT116	HALLMARK_MTORC1_SIGNALING	200	Genes up-regulated through activation of mTORC1 complex.	5	0.025	0.00132	0.00549	SLC2A3, SLC7A11, SCD, STARD4, SYTL2
HCT116	HALLMARK_P53_PATHWAY	200	Genes involved in p53 pathways and networks.	5	0.025	0.00132	0.00549	RGS16, INHBB, S100A4, SLC7A11, RRAD
HCT116	HALLMARK_UV_RESPONSE_DN	144	Genes down-regulated in response to ultraviolet (UV) radiation.	4	0.0278	0.00276	0.0106	NRP1, F3, SMAD7, PPAP2B
RKO	HALLMARK_KRAS_SIGNALING_UP	200	Genes up-regulated by KRAS activation.	27	0.135	1.65e-19	4.13e-18	KLF4, PLAUR, TRAF1, PLAU, GFPT2, SEMA3B, BPGM, PLAT, EMP1, AKAP12, GLRX, ANGPTL4, MAP3K1, NRP1, TFPI, DUSP6, ITGB2, TSPAN1, GPNMB, GADD45G, FGF9, LY96, TMEM158, KCNN4, LCP1, PRDM1, HKDC1
RKO	HALLMARK_TNFA_SIGNALING_VIA_NFKB	200	Genes regulated by NF-kB in response to TNF [GeneID=7124].	27	0.135	1.65e-19	4.13e-18	KLF4, PLAUR, TRAF1, PLAU, GFPT2, CD44, EGR3, BHLHE40, JUN, GADD45A, GEM, SGK1, CDKN1A, IFIT2, KLF6, PTPRE, PLK2, IER5, EHD1, MAP3K8, CCRL2, CXCL3, LAMB3, KLF2, SLC2A6, SERPINB8, BCL2A1
RKO	HALLMARK_ESTROGEN_RESPONSE_EARLY	200	Genes defining early response to estrogen.	26	0.13	2.03e-18	3.39e-17	KLF4, SEMA3B, CD44, EGR3, BHLHE40, PRSS23, FKBP5, FLNB, DHRS2, ALDH3B1, MYOF, FAM102A, HR, CYP26B1, CLIC3, KRT18, SLC19A2, FHL2, AQP3, CALB2, ENDOD1, MAST4, MYBL1, PODXL, RAB17, GREB1
RKO	HALLMARK_EPITHELIAL_MESENCHYMAL_TRANSITION	200	Genes defining epithelial-mesenchymal transition, as in wound healing, fibrosis and metastasis.	25	0.125	2.39e-17	2.99e-16	PLAUR, CD44, JUN, GADD45A, GEM, LAMC2, COL1A1, FBLN5, RGS4, BDNF, LRP1, COL4A2, NT5E, ECM1, HTRA1, MSX1, EMP3, TAGLN, TPM2, LGALS1, LOXL1, NNMT, ACTA2, VIM, CALD1
RKO	HALLMARK_ESTROGEN_RESPONSE_LATE	200	Genes defining late response to estrogen.	22	0.11	2.93e-14	2.93e-13	KLF4, SEMA3B, CD44, EGR3, SGK1, PRSS23, FKBP5, FLNB, DHRS2, ALDH3B1, MYOF, FAM102A, HR, CYP26B1, CLIC3, LAMC2, CAV1, ATP2B4, CD9, ACOX2, TST, PLAC1
RKO	HALLMARK_INTERFERON_GAMMA_RESPONSE	200	Genes up-regulated in response to IFNG [GeneID=3458].	20	0.1	2.6e-12	2.17e-11	BPGM, CDKN1A, IFIT2, MT2A, C1R, IRF9, IFI44, BATF2, SAMD9L, IFIT3, LGALS3BP, OASL, MYD88, CD274, MVP, IFIT1, HLA-B, OAS2, SECTM1, APOL6
RKO	HALLMARK_APOPTOSIS	161	Genes mediating programmed cell death (apoptosis) by activation of caspases.	18	0.1118	4.89e-12	3.49e-11	PLAT, EMP1, CD44, EGR3, JUN, GADD45A, CDKN1A, KRT18, CAV1, HMOX1, GSN, SLC20A1, CTH, BCL10, DPYD, GSTM1, IGFBP6, LMNA
RKO	HALLMARK_HYPOXIA	200	Genes up-regulated in response to low oxygen levels (hypoxia).	19	0.095	2.26e-11	1.41e-10	PLAUR, AKAP12, GLRX, ANGPTL4, MAP3K1, BHLHE40, JUN, CDKN1A, KLF6, CAV1, MT2A
RKO	HALLMARK_P53_PATHWAY	200	Genes involved in p53 pathways and networks.	18	0.09	1.85e-10	1.03e-09	KLF4, JUN, GADD45A, CDKN1A, PTPRE, PLK2, IER5, SLC19A2, HMOX1, NDRG1, CDKN2B, CDKN2A, PLK3, GLS2, IRAK1, KRT17, TM4SF1, RAP2B
RKO	HALLMARK_UV_RESPONSE_DN	144	Genes down-regulated in response to ultraviolet (UV) radiation.	15	0.1042	7.97e-10	3.98e-09	NRP1, TFPI, BHLHE40, FHL2, COL1A1, FBLN5, RGS4, BDNF, CAV1, ATP2B4, CITED2, MGLL, LPHN2, FZD2, GRK5
RKO	HALLMARK_COMPLEMENT	200	Genes encoding components of the complement system, which is part of the innate immune system.	17	0.085	1.43e-09	6.5e-09	PLAUR, PLAT, DUSP6, EHD1, LRP1, COL4A2, C1R, F8, S100A13, C4BPB, PDP1, SH2B3, CTSL1, PCLO, PRSS3, ZEB1, CASP10
RKO	HALLMARK_IL2_STAT5_SIGNALING	200	Genes up-regulated by STAT5 in response to IL2 stimulation.	16	0.08	1.03e-08	4.31e-08	TRAF1, EMP1, NRP1, CD44, BHLHE40, KLF6, MAP3K8, NT5E, ECM1, NDRG1, ALCAM, PLEC, CDCP1, AHNAK, SPRY4, CAPN3
RKO	HALLMARK_INTERFERON_ALPHA_RESPONSE	97	Genes up-regulated in response to alpha interferon proteins.	11	0.1134	5.99e-08	2.3e-07	IFIT2, CCRL2, IRF9, IFI44, BATF2, SAMD9L, IFIT3, LGALS3BP, OASL, SAMD9, UBA7
RKO	HALLMARK_COAGULATION	138	Genes encoding components of blood coagulation system; also up-regulated in platelets.	12	0.087	2.91e-07	1.04e-06	PLAU, PLAT, DUSP6, PRSS23, LRP1, HTRA1, CD9, ACOX2, C1R, GSN, F8, S100A13
RKO	HALLMARK_UV_RESPONSE_UP	158	Genes up-regulated in response to ultraviolet (UV) radiation.	12	0.0759	1.24e-06	4.14e-06	AQP3, MSX1, TST, HMOX1, CDKN2B, C4BPB, ASNS, TUBA4A, CHRNA5, NPTXR, MAPK8IP2, FGF18
RKO	HALLMARK_IL6_JAK_STAT3_SIGNALING	87	Genes up-regulated by IL6 [GeneID=3569] via STAT3 [GeneID=6774], e.g., during acute phase response.	9	0.1034	2.1e-06	6.56e-06	CD44, JUN, MAP3K8, CXCL3, CD9, IRF9, MYD88, HMOX1, EBI3
RKO	HALLMARK_APICAL_JUNCTION	200	Genes encoding components of apical junction complex.	13	0.065	2.6e-06	7.64e-06	TRAF1, LAMB3, CALB2, LAMC2, CD274, CDH15, CLDN4, GRB7, ICAM2, ITGA3, RAC2, SYK, THBS3
RKO	HALLMARK_CHOLESTEROL_HOMEOSTASIS	74	Genes involved in cholesterol homeostasis.	7	0.0946	5.17e-05	0.000143	PLAUR, SEMA3B, CD9, ERRFI1, ALCAM, S100A11, TP53INP1
RKO	HALLMARK_INFLAMMATORY_RESPONSE	200	Genes defining inflammatory response.	10	0.05	0.00032	0.000842	PLAUR, CDKN1A, KLF6, PTPRE, CCRL2, EMP3, EBI3, CSF3, HRH1, SCARF1
RKO	HALLMARK_ANDROGEN_RESPONSE	101	Genes defining response to androgens.	7	0.0693	0.000365	0.000913	AKAP12, SGK1, FKBP5, NDRG1, ELL2, SLC38A2, UAP1
RKO	HALLMARK_TGF_BETA_SIGNALING	54	Genes up-regulated in response to TGFB1 [GeneID=7040].	5	0.0926	0.000686	0.00163	SLC20A1, BCAR3, LTBP2, SMAD6, SMURF2
RKO	HALLMARK_HEME_METABOLISM	200	Genes involved in metabolism of heme (a cofactor consisting of iron and porphyrin) and erythroblast differentiation.	9	0.045	0.00132	0.00287	BPGM, AQP3, ENDOD1, ASNS, ELL2, ANK1, BMP2K, BACH1, SLC22A4
RKO	HALLMARK_MTORC1_SIGNALING	200	Genes up-regulated through activation of mTORC1 complex.	9	0.045	0.00132	0.00287	GLRX, ITGB2, BHLHE40, CDKN1A, CD9, CTH, ASNS, TUBA4A, GSK3B
RKO	HALLMARK_PEROXISOME	104	Genes encoding components of peroxisome.	6	0.0577	0.00245	0.0051	MVP, BCL10, CEL, SEMA3C, STS, PEX2
RKO	HALLMARK_MYOGENESIS	200	Genes involved in development of skeletal muscle (myogenesis).	8	0.04	0.00492	0.00984	BHLHE40, CDKN1A, COL1A1, COL4A2, TAGLN, TPM2, GSN, KLF5

## Sheet: Table S7
Table S7. Overlap analysis with the MSigDB Hallmarks gene set for genes upregulated >1.5 log2 fold by restoration of KMT2C expression in RKO and HCT116 cells.
Cell line	Hallmarks gene set categories	# Genes in Gene Set (K)	Description	# Genes in Overlap (k)	k/K	p-value	FDR q-value	Genes
HCT116	HALLMARK_KRAS_SIGNALING_UP	200	Genes up-regulated by KRAS activation.	8	0.0400	1.73E-8	8.64E-7	HDAC9, NRP1, TSPAN1, FGF9, LCP1, TSPAN7, HKDC1, ITGBL1
HCT116	HALLMARK_COAGULATION	138	Genes encoding components of blood coagulation system; also up-regulated in platelets.	6	0.0435	6.98E-7	1.75E-5	THBS1, SERPINA1, PRSS23, F3, PDGFB, TIMP3
HCT116	HALLMARK_TGF_BETA_SIGNALING	54	Genes up-regulated in response to TGFB1 [GeneID=7040].	3	0.0556	2.42E-4	4.04E-3	THBS1, SMURF2, NOG
HCT116	HALLMARK_ESTROGEN_RESPONSE_LATE	200	Genes defining late response to estrogen.	4	0.0200	1.06E-3	7.57E-3	SERPINA1, PRSS23, LARGE, TNNC1
HCT116	HALLMARK_HYPOXIA	200	Genes up-regulated in response to low oxygen levels (hypoxia).	4	0.0200	1.06E-3	7.57E-3	F3, PDGFB, LARGE, TMEM45A
HCT116	HALLMARK_MTORC1_SIGNALING	200	Genes up-regulated through activation of mTORC1 complex.	4	0.0200	1.06E-3	7.57E-3	SCD, STARD4, SLC7A11, SYTL2
HCT116	HALLMARK_MYOGENESIS	200	Genes involved in development of skeletal muscle (myogenesis).	4	0.0200	1.06E-3	7.57E-3	LARGE, TNNC1, SCD, MYL2
HCT116	HALLMARK_INTERFERON_ALPHA_RESPONSE	97	Genes up-regulated in response to alpha interferon proteins.	3	0.0309	1.35E-3	8.41E-3	CD74, SAMD9, UBA7
RKO	HALLMARK_KRAS_SIGNALING_UP	200	Genes up-regulated by KRAS activation.	21	0.1050	1.97E-15	4.91E-14	KLF4, PLAUR, PLAU, TRAF1, SEMA3B, PLAT, EMP1, DUSP6, AKAP12, ANGPTL4, NRP1, ITGB2, TSPAN1, GPNMB, GADD45G, FGF9, LY96, TMEM158, KCNN4, PRDM1, HKDC1
RKO	HALLMARK_TNFA_SIGNALING_VIA_NFKB	200	Genes regulated by NF-kB in response to TNF [GeneID=7124].	21	0.1050	1.97E-15	4.91E-14	KLF4, PLAUR, PLAU, TRAF1, EGR3, BHLHE40, SGK1, JUN, GADD45A, CDKN1A, IFIT2, EHD1, KLF6, CCRL2, MAP3K8, PLK2, IER5, CXCL3, KLF2, SLC2A6, SERPINB8
RKO	HALLMARK_ESTROGEN_RESPONSE_EARLY	200	Genes defining early response to estrogen.	20	0.1000	2.36E-14	2.95E-13	KLF4, SEMA3B, EGR3, BHLHE40, PRSS23, FLNB, DHRS2, ALDH3B1, MYOF, FAM102A, HR, CYP26B1, CLIC3, KRT18, FHL2, CALB2, MAST4, MYBL1, PODXL, GREB1
RKO	HALLMARK_ESTROGEN_RESPONSE_LATE	200	Genes defining late response to estrogen.	20	0.1000	2.36E-14	2.95E-13	KLF4, SEMA3B, EGR3, SGK1, PRSS23, FLNB, DHRS2, ALDH3B1, MYOF, FAM102A, HR, CYP26B1, CLIC3, LAMC2, CAV1, CD9, ACOX2, ATP2B4, TST, PLAC1
RKO	HALLMARK_EPITHELIAL_MESENCHYMAL_TRANSITION	200	Genes defining epithelial-mesenchymal transition, as in wound healing, fibrosis and metastasis.	19	0.0950	2.67E-13	2.67E-12	PLAUR, JUN, GADD45A, LAMC2, LRP1, COL4A2, HTRA1, NT5E, ECM1, COL1A1, FBLN5, EMP3, MSX1, TPM2, LGALS1, LOXL1, ACTA2, VIM, CALD1
RKO	HALLMARK_INTERFERON_GAMMA_RESPONSE	200	Genes up-regulated in response to IFNG [GeneID=3458].	18	0.0900	2.86E-12	2.38E-11	CDKN1A, IFIT2, C1R, IRF9, IFI44, BATF2, SAMD9L, IFIT3, LGALS3BP, OASL, MYD88, CD274, MVP, IFIT1, HLA-B, OAS2, SECTM1, APOL6
RKO	HALLMARK_APOPTOSIS	161	Genes mediating programmed cell death (apoptosis) by activation of caspases.	15	0.0932	1.15E-10	8.24E-10	PLAT, EMP1, EGR3, JUN, GADD45A, CDKN1A, KRT18, CAV1, HMOX1, GSN, SLC20A1, BCL10, DPYD, IGFBP6, LMNA
RKO	HALLMARK_COMPLEMENT	200	Genes encoding components of the complement system, which is part of the innate immune system.	15	0.0750	2.39E-9	1.33E-8	PLAUR, PLAT, DUSP6, EHD1, LRP1, COL4A2, C1R, F8, S100A13, C4BPB, PDP1, SH2B3, CTSL1, PCLO, ZEB1
RKO	HALLMARK_HYPOXIA	200	Genes up-regulated in response to low oxygen levels (hypoxia).	15	0.0750	2.39E-9	1.33E-8	PLAUR, AKAP12, ANGPTL4, BHLHE40, JUN, CDKN1A, KLF6, CAV1, HMOX1, NDRG1, CITED2, ERRFI1, PRKCDBP, NEDD4L, PLAC8
RKO	HALLMARK_INTERFERON_ALPHA_RESPONSE	97	Genes up-regulated in response to alpha interferon proteins.	11	0.1134	4.41E-9	2.2E-8	IFIT2, CCRL2, IRF9, IFI44, BATF2, SAMD9L, IFIT3, LGALS3BP, OASL, SAMD9, UBA7
RKO	HALLMARK_COAGULATION	138	Genes encoding components of blood coagulation system; also up-regulated in platelets.	12	0.0870	1.84E-8	8.18E-8	PLAU, PLAT, DUSP6, PRSS23, CD9, ACOX2, LRP1, HTRA1, C1R, GSN, F8, S100A13
RKO	HALLMARK_IL2_STAT5_SIGNALING	200	Genes up-regulated by STAT5 in response to IL2 stimulation.	14	0.0700	1.96E-8	8.18E-8	TRAF1, EMP1, NRP1, BHLHE40, KLF6, MAP3K8, NT5E, ECM1, NDRG1, ALCAM, PLEC, CDCP1, AHNAK, CAPN3
RKO	HALLMARK_UV_RESPONSE_DN	144	Genes down-regulated in response to ultraviolet (UV) radiation.	12	0.0833	2.96E-8	1.14E-7	NRP1, BHLHE40, FHL2, CAV1, ATP2B4, COL1A1, FBLN5, CITED2, MGLL, LPHN2, FZD2, GRK5
RKO	HALLMARK_P53_PATHWAY	200	Genes involved in p53 pathways and networks.	12	0.0600	1.05E-6	3.76E-6	KLF4, JUN, GADD45A, CDKN1A, PLK2, IER5, HMOX1, NDRG1, CDKN2B, PLK3, KRT17, RAP2B
RKO	HALLMARK_IL6_JAK_STAT3_SIGNALING	87	Genes up-regulated by IL6 [GeneID=3569] via STAT3 [GeneID=6774], e.g., during acute phase response.	8	0.0920	2.91E-6	9.71E-6	JUN, MAP3K8, CXCL3, CD9, IRF9, MYD88, HMOX1, EBI3
RKO	HALLMARK_CHOLESTEROL_HOMEOSTASIS	74	Genes involved in cholesterol homeostasis.	7	0.0946	1.01E-5	3.17E-5	PLAUR, SEMA3B, CD9, ERRFI1, ALCAM, S100A11, TP53INP1
RKO	HALLMARK_APICAL_JUNCTION	200	Genes encoding components of apical junction complex.	10	0.0500	4.01E-5	1.18E-4	TRAF1, CALB2, LAMC2, CD274, CDH15, CLDN4, GRB7, ITGA3, RAC2, THBS3
RKO	HALLMARK_INFLAMMATORY_RESPONSE	200	Genes defining inflammatory response.	9	0.0450	2.14E-4	5.67E-4	PLAUR, CDKN1A, KLF6, CCRL2, EMP3, EBI3, CSF3, HRH1, SCARF1
RKO	HALLMARK_UV_RESPONSE_UP	158	Genes up-regulated in response to ultraviolet (UV) radiation.	8	0.0506	2.16E-4	5.67E-4	TST, MSX1, HMOX1, C4BPB, CDKN2B, NPTXR, MAPK8IP2, FGF18
RKO	HALLMARK_ANDROGEN_RESPONSE	101	Genes defining response to androgens.	6	0.0594	5.73E-4	1.43E-3	AKAP12, SGK1, NDRG1, ELL2, SLC38A2, UAP1
RKO	HALLMARK_TGF_BETA_SIGNALING	54	Genes up-regulated in response to TGFB1 [GeneID=7040].	4	0.0741	2.16E-3	5.14E-3	SLC20A1, BCAR3, LTBP2, SMAD6
RKO	HALLMARK_PEROXISOME	104	Genes encoding components of peroxisome.	5	0.0481	4.13E-3	9.39E-3	MVP, BCL10, CEL, SEMA3C, STS
RKO	HALLMARK_MYOGENESIS	200	Genes involved in development of skeletal muscle (myogenesis).	7	0.0350	4.37E-3	9.49E-3	BHLHE40, CDKN1A, COL4A2, COL1A1, TPM2, GSN, KLF5
